## Title

The Effect of COVID-19 on the Postdoctoral Experience: a comparison of pre-pandemic and pandemic surveys.

## Authors

Morin, Andréanne.,<sup>1,6,7</sup> Helling, Britney A.,<sup>1,6</sup> Krishnan, Seetha.,<sup>2,6</sup> Risner, Laurie E.,<sup>3</sup> Walker, Nykia D.,<sup>4</sup> Schwartz, Nancy B.<sup>3,5,7</sup>

1. University of Chicago, Department of Human Genetics
2. University of Chicago, Department of Neurobiology and Institute for Neuroscience
3. University of Chicago, Department of Pediatrics
4. University of Chicago, The Ben May Department for Cancer Research
5. University of Chicago, Department of Biochemistry and Molecular Biology
6. These authors contributed equally
7. Correspondence should be addressed to: A.M.: [amorin@uchicago.edu](mailto:amorin@uchicago.edu), N.B.S: [n-schwartz@uchicago.edu](mailto:n-schwartz@uchicago.edu)

## 1 **Abstract**

2 In the interest of advocating for the postdoctoral community in the United States, we  
3 present results from survey data collected before and during the COVID-19 pandemic on  
4 the same population of postdocs. In 2019, 5,929 postdocs in the US completed a  
5 comprehensive survey, and in 2020, a subset completed a follow-up survey several  
6 months into the pandemic. The results show that the pandemic has substantially impacted  
7 postdocs' mental health and wellness irrespective of gender, race, citizenship, or other  
8 identities. Postdocs also reported a significant impact on their career trajectories and  
9 progression, reduced confidence in achieving career goals, and negative perceptions of  
10 the job market compared to pre-COVID-19. International postdocs also reported  
11 experiencing distinct stressors due to the changes in immigration policy. Notably, having  
12 access to Postdoctoral Associations and Postdoctoral Offices positively impacted  
13 postdocs' overall well-being and helped mitigate the personal and professional stresses  
14 and career uncertainties caused by the pandemic.

15

## 16 **Introduction**

17 Often unknown to those outside of the scientific community and overlooked by their  
18 own institutions compared to faculty and students, postdocs have long been referred to  
19 as the invisible component of the University<sup>1</sup>. Typically, postdocs lack job security as they  
20 are funded by research grants tied to an individual faculty member and are subjected to  
21 annual contracts; they receive lower pay in comparison to non-academic peers in  
22 government or industry; and frequently lack employee-type benefits such as paid family  
23 leave<sup>2,3</sup>. The COVID-19 pandemic has made these situations worse for postdocs<sup>4-7</sup>.

24           The impact of the pandemic on postdocs is not unlike the severe and far-reaching  
25 effects the COVID-19 pandemic has had worldwide. In the US alone, significant job loss,  
26 educational disparities, and elevated mental health issues have dramatically affected the  
27 workforce<sup>7-9</sup>; such that the detrimental impact on the global economy may extend through  
28 the next decade<sup>10</sup>. There has been a similar adverse effect on the biomedical workforce<sup>11-</sup>  
29 <sup>14</sup>. Although the financial impact of COVID-19 on scientific productivity has not yet been  
30 fully realized, the NIH estimates a \$16 billion loss because of delayed research<sup>15</sup>. In fact,  
31 the Bureau of Labor Statistics reported the largest decline in college and university  
32 employment since the 1950s<sup>5,16,17</sup>. Furthermore, numerous universities retracted or  
33 deferred new faculty job offers, leaving postdocs, who are the source of future academics,  
34 to either consider different career paths or extend their current postdoc positions<sup>18</sup>.

35           One report in Nature has addressed the impact of the pandemic on the STEM  
36 postdoc population<sup>19</sup>. This report indicates that nearly two-thirds of postdocs surveyed  
37 believed that their long-term career prospects were negatively affected by the COVID-19  
38 pandemic; roughly 8 out of 10 postdocs reported that the pandemic had hampered their  
39 ability to conduct experiments and collect data, and more than half had difficulty  
40 communicating with supervisors and colleagues.

41           We have long been interested in the postdoctoral experience in the US with  
42 respect to career choices, mentorship, grantsmanship, and gender disparities and in 2016  
43 released the first comprehensive survey of postdocs<sup>20</sup> since 2005<sup>21</sup>. Our extensive study  
44 of over 7,500 postdocs from 351 institutions assessed the factors that influenced postdoc  
45 satisfaction and career plans<sup>20</sup>. We conducted a second survey from mid to late 2019 to  
46 continue tracking these aspects of the postdoc experience over time. This updated survey

47 queried >6,000 postdocs from various institutions nationwide. As the effects of the  
48 COVID-19 pandemic began to be felt widely, a follow-up survey was conducted in the Fall  
49 of 2020 on a subset (n=1,942) of the 2019 survey respondents to assess the impact of  
50 the pandemic on the postdoc trainee population.

51 Here we present a comparison of survey data collected before and during the  
52 COVID-19 pandemic on the same group of postdocs working in the US. We investigated  
53 the impact of the pandemic on mental health and wellness, changes in their career  
54 trajectories and progression, and their confidence in achieving their career goals. Due to  
55 government policy changes enacted during the pandemic that affected international  
56 travel, immigration, and visa access, we also looked at specific challenges that the  
57 pandemic had on international postdocs working in the US. Finally, we investigated the  
58 impact of COVID-19 on the availability of wellness and mental health resources, as well  
59 as the role that institutional Postdoctoral Associations and Postdoctoral Offices had on  
60 postdocs' overall well-being during the pandemic, as these critical factors have not been  
61 previously explored.

62

## 63 **Results**

64 In 2019 (June to December), we conducted a national survey to assess the  
65 postdoctoral experience in the US. The goal of this initial survey was to serve as an  
66 update and to expand upon our national survey conducted in 2016<sup>20</sup>. In the early months  
67 of 2020, the consequences of the COVID-19 pandemic began to impact daily life across  
68 the United States. To understand the effects of the pandemic in the context of the  
69 postdoctoral experience, we re-surveyed a subset of postdocs who completed the 2019

70 survey between October 1 and November 3 of 2020. This follow-up survey allowed us to  
71 query the same population before and during the pandemic to assess its consequences  
72 more directly.

### 73 Demographics

74 In 2019, 6,292 respondents participated in our national postdoc survey, of which  
75 5,929 identified as postdocs in the US. These respondents were 58% female, 41% male  
76 and 0.4% non-binary/third gender (**Figure 1A**). Regarding race and ethnicity, 60% of the  
77 respondents were white, 27% were Asian, and 13% were from underrepresented minority  
78 backgrounds (URMs; because some racial and ethnic groups were small, we combined  
79 individuals into these three main categories for analyses - see Methods for a full  
80 description and **Supplementary file 3** for a more granular description) (**Figure 1B**). US  
81 citizens or Permanent Residents (PR; referred to as US citizens/PR throughout this  
82 manuscript) made up 53% of the respondents, and 47% were international postdocs  
83 working in the US on temporary visas (J1, H1B, TN, F1, F1-OTP, E3 visas) (**Figure 1C**).  
84 The majority (55%) of postdocs were 30-34 years old (**Figure 1D**), and most respondents  
85 were in their first (39%) or second (29%) year of their postdoctoral training (**Figure 1E**).  
86 Respondents were from various disciplines, mostly within life sciences (48%), followed  
87 by medicine, physical sciences, engineering, psychology, environmental sciences, and  
88 social sciences, among other research areas. (**Figure 1F**).

89 In October of 2020, 1,942 of the 6,292 respondents who participated in the 2019  
90 survey, completed a follow-up survey assessing the effects of the COVID-19 pandemic.  
91 Of these, 1,722 (89%) were still in a postdoctoral position at a US institution. From here  
92 on, we refer to the 2019 survey as the pre-pandemic survey and the 2020 survey as the

93 pandemic survey. Furthermore, in our analyses of current postdocs, we removed the 11%  
94 of respondents in the pandemic survey who were no longer in postdoctoral positions,  
95 however, we analyzed their career outcomes separately in **Figure 5**.

96 As shown in **Figure 1**, the demographics of the respondents to the pandemic  
97 survey largely mirrored those of the pre-pandemic survey. The number of respondents in  
98 the pandemic and pre-pandemic survey by US states is shown in **Figure 1–figure**  
99 **supplement 1A-B**. There were slightly more responses from individuals who identified  
100 as female (61% vs. 58%) and non-binary/third gender (0.9% vs. 0.4%), and fewer self-  
101 identified males (38% vs. 42%) in the pandemic survey compared to the pre-pandemic  
102 survey (**Figure 1A**). Race and ethnicity varied between the pre-pandemic and pandemic  
103 survey respondents, with a 4% increase in the proportion of respondents who identify as  
104 white and a corresponding 4% decrease in the respondents who identify as Asian. No  
105 differences were observed between the proportion of URMs (13%; **Figure 1B**; **Figure 1–**  
106 **figure supplement 1C**) or in identity groups (i.e., disability, LGBTQ, and veterans)  
107 (**Figure 1–figure supplement 1D**). When analyzed by citizenship, there was an increase  
108 in respondents who were US citizens/PR (53% pre-pandemic vs. 57% pandemic) and a  
109 corresponding decrease in international respondents (47% pre-pandemic vs. 43%  
110 pandemic) (**Figure 1C**). Given that we conducted the pandemic survey within a sub-  
111 population of those in the pre-pandemic survey at a later date, the age of the pandemic  
112 respondents was higher than the pre-pandemic respondents, and as expected, they were  
113 more advanced in their postdoc tenure (**Figure 1D-E**). There was a significant decrease  
114 in respondents in the field of medicine (13% pre-pandemic and 9% pandemic), while there  
115 was no significant change in the representation of any other field (**Figure 1F**). Lastly,

116 there was a significant increase in access to a PDO (65.6% pre-pandemic vs 70%  
117 pandemic), which was mainly due to an increased awareness, but no differences in term  
118 of access to a PDA (**Figure 1–figure supplement 1F-G**).

### 119 COVID-19 Impact

120 To directly assess the effects of COVID-19 on postdocs, we queried three general  
121 areas: stressors during the pandemic, institutional response to the pandemic, and ability  
122 to meet basic needs. In an open-ended question enquiring about the main stressors  
123 during the pandemic, postdocs indicated that their main stressors were a combination of  
124 work, family, and emotional burdens, as shown by the word cloud analysis of the  
125 responses (**Figure 2A-B**). Individual responses showed how postdocs experienced  
126 different types of burdens. Parents and caregivers faced the burden of “being a full time  
127 [sic] postdoc and staying home with two kids” or caring for a loved one who was/is  
128 struggling with COVID-19. As one postdoc indicated, “my girlfriend has been recovering  
129 from COVID-19 since March. It’s a grueling process to watch and support.” A large  
130 number of postdocs also indicated that work progress was more difficult due to “getting  
131 research done within limited shifts and hours” and an overall fear of “loss of productivity”.  
132 Many international postdocs were concerned about their visas and one respondent even  
133 indicated that the international office at their institution told them “...you will lose your job  
134 if you leave the country for any reason and are not a resident.” **Table 1** includes additional  
135 representative responses.

136 Next, we looked at the institutional response to COVID-19, which ranged from  
137 completely satisfied to completely unsatisfied. Most postdocs indicated that they were  
138 completely or mostly satisfied with their institution’s response to COVID-19 (59%) (**Figure**

139 **2C**). In particular, postdocs with access to a Postdoctoral Affairs Office (PDO; i.e.,  
140 institutional entities, staffed by professionals and funded by institutions, that advocate for  
141 postdocs and promote initiatives to support postdoctoral training and professional  
142 development, and establish policies for compensation, benefits, term limits, eligibility,  
143 etc.) were significantly more satisfied than those who did not or were unaware of this  
144 institutional asset (**Figure 2D**). Moreover, there were no differences in satisfaction to their  
145 institution's response between those with or without access to a Postdoctoral Affairs  
146 Association (PDA; i.e., institutional organizations composed of and managed by  
147 postdoctoral scholars that actively engage and represent the postdocs) (**Figure 2D**), or  
148 with respect to gender, citizenship status, race and ethnicity, or identity (ordinal logistic  
149 regression,  $p > 0.05$ , data not shown). Notably, there was also a non-negligible portion  
150 (4%) of postdocs who indicated they were completely unsatisfied with their institution's  
151 response to COVID-19, with one respondent commenting, "... my institution did almost  
152 NOTHING to ensure that faculty and staff can be safely back at work".

153         Although the majority of postdocs indicated that all of their basic needs were met  
154 during the pandemic (64%), a significant portion (36%) indicated that their needs  
155 concerning mental health (21%), childcare (11%), healthcare (7%) and/or food (2%) were  
156 unmet (**Figure 2E**). Additionally, 3% of postdocs wrote in responses mentioning other  
157 unmet needs, including the inability to pay bills, exercise, loss of access to transportation,  
158 work safety, human connections, or loss of salary, retirement benefits, or annual raise.  
159 Furthermore, although the majority of postdocs indicated that all of their basic needs were  
160 met, the comments indicated that the pandemic had made meeting those needs more  
161 difficult: "My husband lost his job, and while we are not in danger of basic needs not being



162 met it does change some things and adds additional stress”. Postdocs who had all of their  
163 basic needs met were more likely to have access to a PDA (65% (yes (access to a PDA))  
164 and 50% (no (no access to a PDA)); **Figure 2F**). Furthermore, postdocs with access to a  
165 PDO or a PDA were less likely to have their mental health needs unmet (PDO: 32% (no)  
166 vs. 19% (yes); PDA: 37% (no) vs. 20% (yes), no differences were observed between  
167 those not aware and aware of a PDA or PDO at their institution, **Figure 2F**). Lastly,  
168 postdocs who identified as Asian (the majority of whom were international (76%)) were  
169 more likely than white postdocs to report unmet needs with respect to health care (12%  
170 vs. 5%) or food (5% vs. 1%) (**Figure 2–figure supplement 1A**). No differences were  
171 observed according to gender, identity, or URM status (Chi-squared test,  $p>0.05$ , data  
172 not shown).

173       Postdoc parents were particularly affected by pandemic-related shutdowns. While  
174 we did not directly inquire of respondents in the pandemic survey whether they had  
175 children (in the pre-pandemic survey, 20% of postdocs answered that they had children),  
176 10% of respondents mentioned in comments that ensuring their children had proper care  
177 was a major stressor and led to severe work disruptions. Additionally, 68% of these  
178 comments were from female respondents and 32% from males suggesting a greater  
179 burden of childcare for female postdocs. Overall, childcare was the 5th most frequently  
180 mentioned stressor (**Figure 2A-B**). Parents mentioned “I have lost childcare for my baby  
181 and it has had a significant impact on my ability to write, complete research goals, and  
182 apply for grants”; “It was difficult to do any writing- or reading-based work because the  
183 daycares were closed, and my partner and I had to divide the day into childcare/work  
184 time”; “Loss of productivity due to loss of childcare, feeling like I am slipping behind my

185 colleagues without children”. Some reported feeling burnt out from putting in long hours  
186 and mentioned lack of support from their peers and their university; “Lack of childcare  
187 and intense pressure from PI to continue long hours at home”; “Loss of childcare and co-  
188 workers not respectful of the loss of childcare”; “My institution enacted strict ... "shift  
189 schedules" that were outside of childcare hours so I was unable to work a full work week.  
190 However, I was expected to produce the same (if not more) results/data to make up for  
191 the time we were locked out” (more examples in **Table 1**).

192         Shutdowns also had an adverse impact on postdocs’ relationships with their  
193 Principal Investigator (PI) and coworkers. When asked if respondents were able to  
194 maintain regular contact with their PI and coworkers, half of the respondents (50%)  
195 reported they had but not as much as before the pandemic and 1% reported no contact  
196 (49% reported maintaining as much contact as before the pandemic). In open-ended  
197 responses, postdocs indicated facing high demands from PIs and unrealistic expectations  
198 to be productive during the pandemic (examples in **Table 1**). Some felt that work from  
199 home was expected to be "business as usual" and there was immense pressure to “work  
200 round the clock”, “work long hours and continuously produce results” and “produce data  
201 when no lab activities are allowed”. One respondent indicated inability to utilize  
202 institutional support due to over-work: “the PI puts a large amount of pressure and  
203 therefore there is really no time to make use of any of the resources”. Conversely,  
204 supportive PIs were lauded for their role in lessening stress. Respondents mentioned: “I  
205 did not have a lot of stress factors. I was lucky to have a supportive PI that understood  
206 how stressful a time this can be and set a pretty low expectation bar”; “working from home

207 during shutdown with a 5yo kid was impossible, really stressful and I am happy my PI  
208 was understanding and let me work half time.”

209 International postdocs reported more difficulty in meeting basic needs such as  
210 health care (10% vs. 6%) and food (4% vs. 1%), while US citizens/PR reported more  
211 difficulty in obtaining childcare (13% vs 9%) (**Figure 3A**). Additionally, international  
212 respondents (n=718) expressed specific worries regarding their residency status. The  
213 majority of international postdocs reported apprehension about immigration or visas either  
214 due to recent policy changes in the US (84%) or in general (11%) (**Figure 3B**). The  
215 primary concerns noted were traveling (75%), US immigration policy changes (69%), and  
216 travel bans (68%) (**Figure 3C, Table 1**). Furthermore, more international females than  
217 males were worried about immigration issues (89% vs. 78%) (**Figure 3–figure**  
218 **supplement 1A**); specifically, travel (80% vs. 70%), delays in visa renewal (65% vs.  
219 56%), and travel bans (72% vs. 62%) (**Figure 3–figure supplement 1B**).

### 220 Mental Health and Wellness

221 Overall, 76% of respondents stated that the COVID-19 pandemic had impacted  
222 their mental health, with 32% stating that it had a high or very high impact (**Figure 4A**). In  
223 open-ended responses, postdocs mentioned significant impacts on their mental health  
224 due to isolation and pandemic associated stressors leading to reduced productivity,  
225 inability to focus and work effectively: “My mental health has been struggling, which has  
226 negative consequences on my ability to focus”; “The isolation has had a negative effect  
227 on my mental health ... ”; “Mental health diminished productivity despite being able to  
228 work 100% remotely” (see **Table 1** for more examples).

229 All gender, race and ethnicity, and identity groups indicated a significant impact on  
230 mental health. However, certain groups reported more of an impact than others; females  
231 and third gender/non-binary reported a greater impact than males (80% and 88% vs.  
232 68%); US citizens/PR reported more of an impact than international postdocs (79% vs.  
233 72%); white and URM postdocs reported more of an impact than Asian postdocs (78%  
234 and 80% vs. 68%); members of the LGBTQ community (83% vs. 75%) and postdocs with  
235 disabilities (88% vs. 76%) reported more of an impact than postdocs not identifying with  
236 these groups (**Figure 4B**).

237 Parallel to this impact on mental health, access to institutional mental health  
238 resources rose by 14% (**Figure 4C**), which appears to be linked to an increase in  
239 awareness, although only 17% of postdocs indicated use of these resources. Certain  
240 groups reported higher usage of these resources: female and third gender/non-binary  
241 postdocs compared to male (female 21% and non-binary/third gender 31% vs. male 10%)  
242 and postdocs with disabilities compared to those without disabilities (31% vs. 16%,  
243 **Figure 4B**). Some of the groups that indicated a greater impact on their mental health  
244 (females, third gender/non-binary, postdocs with disabilities) were also more likely to  
245 access mental health resources (**Figure 4B**), while other groups that reported a higher  
246 impact on mental health (white, LGBTQ and US citizens/PR) were less likely to seek help  
247 (**Figure 4B**). Notably, postdocs without access to, or who were unaware of, institutional  
248 mental health resources were more likely to have their mental health impacted by COVID-  
249 19 than postdocs with those resources (**Figure 4D**). These data suggest: the broad effect  
250 of COVID-19 on mental health in US postdocs; indicate unmet needs in this trainee  
251 population; and highlight the significance of institutional resources.

252           Indeed, postdocs were more likely to have their mental health needs met if their  
253 institution provided these resources (84%) than if their institution either did not provide  
254 them (42%) or if they were unaware of these resources at their institution (68%, **Figure**  
255 **4E**). Access to institutional mental health resources was also associated with whether  
256 postdocs had their basic needs met during the pandemic. Overall, postdocs at institutions  
257 that provided mental health resources were more likely to have all their basic needs met  
258 (69%) compared to those without (35%) or unaware of these resources (50%) (**Figure**  
259 **4F**). Unsurprisingly, postdocs that did not have access to, or were unaware of mental  
260 health resources at their institutions, were also more likely to have other basic needs  
261 unmet such as food (8% (no), 2% (yes), 4% (not aware)) or health care (21% (no), 7%  
262 (yes), 7% (not aware); **Figure 4–figure supplement 1A**). In written responses, several  
263 postdocs mentioned that their institutions provided mental health resources, however they  
264 were often unaffordable or inaccessible: “ ... doesn't take postdocs appointments for  
265 mental health or other such services they are completely booked [*sic*].”; “Limited financial  
266 resources to pay to access mental health resources as "free" sessions through employer  
267 was used pre-COVID.”; “ ... has mental health resources but they are not free at all.”;  
268 “Note, the mental health resources available to post-docs and faculty here are minimal,  
269 but they do exist -- mostly things like meditation workshops. ... However, whether any of  
270 these resources are available to postdocs depends on whether our funding is internal  
271 ('associates', as I am) or external ('fellows', who receive fewer benefits)”. These stark  
272 differences between institutions with mental health resources and those without, highlight  
273 the widespread importance of mental health care and its correlation with quality of life in  
274 the postdoctoral population.

275 As previously indicated (**Figure 2F**), access to a PDA and/or a PDO also increased  
276 the likelihood of mental health needs being met. This trend may be due in part to a larger  
277 proportion of postdocs with access to a PDO/PDA also having access to mental health  
278 resources (82% and 80%) compared to those that did not (59% and 61%) or were  
279 unaware (66% and 60%) (**Figure 4G-H**). Postdocs with a PDO/PDA were also more likely  
280 to use their institution's mental health resources (19% and 18%) compared to those that  
281 did not have access (9% and 11%) or were unaware of these resources (13% and 9%,  
282 **Figure 4G-H**).

### 283 Career Trajectory

284 The pandemic dramatically impacted career trajectories of the postdocs due to lab  
285 shutdowns, inability to communicate with faculty supervisors and research group  
286 members, and most significantly, additional family responsibilities, etc., compared to one  
287 year earlier (see word cloud in **Figure 2A-B** and select comments in **Table 1**). This  
288 resulted in reduced research productivity, delayed job searches, lowered confidence in  
289 attaining the desired career, and uncertainty in overall career trajectory. Even though the  
290 postdocs were older and had more years of experience when re-surveyed (**Figure 1D-**  
291 **E**), a smaller proportion were currently looking for positions (64% pre-pandemic, 56%  
292 during the pandemic), with 11% of postdocs specifically delaying their job search because  
293 of the pandemic (**Figure 5A**). In addition, postdocs were less confident in achieving their  
294 career goals than before the pandemic (**Figure 5B**), which may be contributing to the  
295 observed decline in those actively pursuing new positions (**Figure 5A**). Furthermore,  
296 more postdocs were undecided about their future careers than before the pandemic (9%

297 to 12%) (**Figure 5C**). Together, these results highlight the substantial increase in career  
298 uncertainty felt by postdocs.

299 Overall, 34% of postdocs reported changing their career plans during the  
300 pandemic, with 23% of respondents indicating that COVID-19 was the direct cause of  
301 their change (**Figure 5D**). This latter group was more likely to be undecided about future  
302 careers (20% vs. 7%) or considering non-academic positions (28% vs. 14%), and much  
303 less likely to be seeking an academic position (51% vs. 79%) compared to postdocs who  
304 did not change their career plans (66% of surveyed postdocs) (**Figure 5–figure**  
305 **supplement 1A**). The main reasons cited for career trajectory changes were: i) difficulty  
306 in obtaining the desired position (77%), ii) insufficient job security (52%), and iii) balancing  
307 family and career (50%) (**Figure 5E**). Additionally, reasons for career change differed by  
308 citizenship status and race/ethnicity. International postdocs cited more peer pressure than  
309 US citizen/PR (8% vs. 1%), while the latter noted more difficulty in obtaining desired  
310 positions (83% vs. 69%) as well as balancing family and career (58% vs. 39%, **Figure 5–**  
311 **figure supplement 1B**). Moreover, Asian postdocs indicated more peer pressure as a  
312 reason for changing career trajectory (9% vs. 4% in URM and 3% in white, **Figure 5–**  
313 **figure supplement 1C**). Lastly, we observed no differences by gender or identity groups  
314 with respect to reasons for changing career trajectory (Chi-squared test,  $p > 0.05$ , data not  
315 shown).

316 The majority of postdocs surveyed also reported a change in their perception of  
317 the job market (81%) (**Figure 5F**), with certain subgroups reporting differential changes;  
318 more US citizens/PR than international postdocs (85% vs. 74%, **Figure 5–figure**  
319 **supplement 1D**) and fewer Asian (77% compared to URM (83%) and white (82%),

320 **Figure 5–figure supplement 1E)** reported a change in perception. No differences were  
321 observed based on gender or identity groups (Chi-squared test,  $p>0.05$ , data not shown).  
322 This altered perception was observed for both the academic and non-academic job  
323 markets. Overall, the majority of the respondents viewed the current academic job market  
324 as poor (66%) or fair (26%), which is a significant change compared to the pre-pandemic  
325 survey, where fewer postdocs viewed the market as poor (44%) and more viewed it as  
326 fair (33%). Although the perception of the job market outside of academia was better -  
327 28% of the respondents found it either excellent or good compared to academic careers  
328 (8%) - there was still a decrease in perception from the pre-pandemic survey (**Figure 5G-**  
329 **H)**. Altogether, the perception of both career paths had markedly declined (**Figure 5G-**  
330 **H)**.

### 331 Career Changes During the Pandemic

332 The postdoctoral position is considered temporary with the ultimate goal of  
333 providing the necessary training and experience to successfully transition to more  
334 permanent careers. To better understand the effects of the pandemic on career  
335 outcomes, we surveyed those who were no longer in postdoctoral positions. Of those who  
336 responded to the second survey, 11% (219/1,941) were no longer postdocs, with 14%  
337 indicating that this career transition was a consequence of the pandemic (**Figure 6A)**.  
338 Overall, 56% of the postdocs who made career transitions remained in academic  
339 positions (clinical, research staff, or faculty), while nearly 8% were unemployed. When  
340 we separately examined the postdocs who made career transitions as a consequence or  
341 irrespective of the pandemic, we observed a profound difference in career outcomes. The  
342 former group was more likely to be unemployed (38% vs. 6%) and less likely to be in



343 academic positions than postdocs who chose to leave their position regardless of the  
344 pandemic (24% vs. 65%), while we observed little difference in those pursuing non-  
345 academic careers (38% vs. 29%; **Figure 6B**).

346

## 347 **Discussion**

348 Early in March of 2020, the COVID-19 pandemic forced research facilities across  
349 the US to drastically alter their activities. This resulted in a cascade of events, including  
350 loss of research progress, career advancement, and a further imbalance of work and life  
351 activities. To investigate the impact of these changes on the postdoctoral experience, we  
352 took advantage of our recently completed national postdoctoral survey (June - December  
353 2019) and re-surveyed the same population during the pandemic (between October 1  
354 and November 3 2020). Unsurprisingly, given that the pandemic survey was conducted  
355 in a subset of the pre-pandemic survey, the demographics were comparable between the  
356 two surveys, with the exception of the respondents being older and further along in their  
357 careers, as expected. Furthermore, as the survey was only open during a restricted period  
358 (1 month), it allowed us to capture a defined period of the pandemic. Even though we did  
359 not interrogate during the first few months with full lockdowns, we surveyed postdoc  
360 during the second wave (in the US), when many institutions were only partially opened to  
361 support social distancing, before access to vaccines and right before the 2020 US  
362 elections. Our data provide a unique opportunity to directly assess the effects of the  
363 pandemic on the postdoctoral experience.

364 Although there have been multiple reports of the pandemic's impact on the STEM  
365 workforce<sup>13,22-25</sup> few have discussed postdocs specifically<sup>26,27</sup>. Using our pandemic

366 survey, we were able to ascertain the impact of COVID-19 on mental health, ability to  
367 meet basic needs, and career trajectory; as well, the analysis revealed the importance of  
368 institutional resources for postdocs. Although our surveys indicate that the majority of all  
369 postdocs were affected by loss of productivity and overwhelming mental health  
370 challenges during the pandemic, demographic subgroups experienced the effects of the  
371 pandemic differently. Furthermore, our survey highlights the additional burden of the  
372 pandemic on international postdocs, those from underrepresented minority groups, and  
373 women. Importantly, the ability to do a comparative analysis of pre-pandemic to pandemic  
374 responses revealed profound effects of the pandemic on career trajectories of postdocs.  
375 Many postdocs also provided commentary to the two open-ended response questions in  
376 our pandemic survey (2,768 comments were collected), which further demonstrated the  
377 impact of the pandemic on the postdoctoral population (see representative quotes in  
378 **Table 1**).

379 As previously indicated, this survey provides a unique “before-and-during”  
380 opportunity to observe the effects of COVID-19 on postdoctoral life. However, there were  
381 some limitations to our study. First, although the pandemic survey was conducted in a  
382 subset of the pre-pandemic respondents and therefore was more directly comparable,  
383 the responses were anonymized, and we are unable to do a direct one-to-one comparison  
384 of pre-pandemic to pandemic responses on an individual level. Furthermore, although we  
385 were able to assess caregivers through responses to a handful of questions, including  
386 the written responses, we did not directly ask if respondents were parents or caregivers,  
387 limiting our ability to assess those effects more directly. Lastly, because of sample sizes,  
388 we were limited in our ability to evaluate certain metrics for some demographics such as

389 the LGBTQ, third gender, individuals with disabilities and certain races/ethnicities. To be  
390 able to parse out potential differences between racial and ethnic groups, we pooled all  
391 individuals into three broad groups; white, Asian and URM. Nonetheless, these data still  
392 represent a rich collection of information about the postdoctoral experience before and  
393 during the pandemic.

394 As is apparent from our survey data, access to institutional resources is critical not  
395 only for the ability of postdocs to complete their work in safe and supportive environments  
396 - as is often the focus of institutional efforts - but also for their mental and physical  
397 wellbeing as we note in this manuscript. Along with these resources, our data indicate the  
398 importance of institutional tracking of postdoc populations. As we previously reported<sup>20</sup>,  
399 postdocs are an often overlooked and forgotten population in academia, with a non-  
400 negligible number of institutes being unaware of their total postdoc population, let alone  
401 the concerns of that population. Here we've shown that nearly a quarter of all postdocs  
402 felt that their mental health needs were unmet during the pandemic and just as unsettling,  
403 a non-negligible proportion struggled with access to food (2%) and healthcare (7%). In a  
404 position that emphasizes sacrifice for research, institutions need to pay more attention to  
405 ensure that minimal basic needs are met and assume responsibility for these burdens.  
406 Moreover, respondents that were no longer in postdoctoral positions due to the pandemic  
407 had higher rates of unemployment. We did not collect detailed information about these  
408 former postdocs and more follow-up studies are needed to track their outcomes.  
409 Furthermore, in the ~7 months between the beginning of the pandemic and the survey,  
410 we were already able to see hints of long-term consequences such as delayed job  
411 searches, lost productivity, lost positions, fewer opportunities, and altered career

412 trajectories. Moving forward, we plan to continue to survey US-based postdocs in order  
413 to generate a better understanding of the long-term consequences of the COVID-19  
414 pandemic on postdoc experiences and outcomes. Ultimately, understanding the needs of  
415 this critical workforce will also broadly benefit the future of science and research.

416

## 417 **Methods**

### 418 Survey design and dissemination

419         The National Postdoctoral Survey was designed to capture the experiences and  
420 demographic information of postdoctoral fellows and scholars across the United States.  
421 The survey was initially conceived and developed by postdocs within the University of  
422 Chicago's Biological Sciences Division Postdoctoral Association (PDA) in 2016, in order  
423 to identify important issues within the postdoctoral community and inform and equip those  
424 who advocate for postdoctoral policies to make positive changes. The results of the first  
425 National Postdoc Survey were published by McConnell, et al. in 2018<sup>20</sup>.

426         In 2019, a second updated version of the National Postdoc Survey was launched  
427 by the University of Chicago PDA. This version, referred to as the "pre-pandemic survey",  
428 collected responses from postdocs in the United States from June 4, 2019, until  
429 December 31, 2019. In order to make postdocs across the US aware of the survey,  
430 multiple types of grass-roots outreach were used in a similar manner to McConnell, et  
431 al.<sup>20</sup> First, we performed online website searches for Postdoc Offices (PDOs) at doctoral  
432 degree-granting universities or research institutions in the US that train postdocs. We  
433 compiled a list of publicly available email addresses for institutional representatives of  
434 these PDOs. If we were unable to identify a PDO, or if an institution did not have a PDO,

435 then contact information was collected instead for an administrative or faculty  
436 representative within an Office of Research, Graduate School, or Provost, or for a similar  
437 official who might have access to postdocs. We also collected contact information, if  
438 available, for postdoc leaders of Postdoctoral Associations (PDA), which we contacted if  
439 institutions did respond to our initial outreach or if an institution's response rate was  
440 deemed low compared to the 2016 National Postdoc Survey. We emailed over 400  
441 institutional PDOs, other administrative contacts or PDA leaders, described the goals of  
442 the survey, and asked them to distribute our survey link and invitation to the postdocs at  
443 their institution. Over the course of the 7 months that the survey was open, follow-up  
444 emails were sent to our contacts to remind them to send the email to their postdocs, or to  
445 distribute the survey link if they had not already done so. In addition to our outreach to  
446 institutional representatives, we shared the survey on social media websites including  
447 Twitter and LinkedIn, launched a website dedicated to the National Postdoc Survey, and  
448 prepared an email campaign to advertise the survey which was distributed by the National  
449 Postdoctoral Association to its large national listserv of postdocs and postdoc advocates.  
450 These additional methods were used to enhance awareness of the survey and distribute  
451 the survey link directly to postdocs who may not have received it through their institution.

452         During the 7 months that the survey was open, responses from 6,292 postdocs  
453 were collected from over 300 institutions in nearly every state in the nation. All responses  
454 were collected anonymously, but many respondents voluntarily provided contact  
455 information in a separate form to draw names for survey incentive prizes. Of the 6,292  
456 respondents to the survey, 5,929 identified as postdocs at a US institution and only their  
457 responses were used for analysis.

458 While analysis of the 2019 pre-pandemic survey data was underway, the COVID-  
459 19 pandemic commenced, and it became evident that a follow-up survey was necessary  
460 to assess the changes brought on by the pandemic in the mindsets and current situations  
461 of postdocs. Questions were designed in 2020 for a shorter “pandemic survey” to query  
462 what changes the postdocs experienced in their career goals and whether their plans  
463 changed since the pandemic started, current perceptions of the job market in academia,  
464 and how their research and life has been affected by the pandemic. All postdocs who  
465 completed the initial pre-pandemic survey and submitted their email addresses for  
466 recontact were asked to complete this second pandemic survey, which was launched on  
467 October 1, 2020 and stayed open for one month. In total, 1,942 responses to the  
468 pandemic survey were collected. Of these responses, 1,722 were submitted by  
469 researchers currently in postdoctoral positions in the United States, and these responses  
470 are analyzed here. Pre-pandemic and pandemic survey questionnaires are included in  
471 **supplementary file 1** and **supplementary file 2** respectively.

472

### 473 Data Analyses

474 We used two definitions of race and ethnicity, a more granular one: comparing  
475 each group to the rest of the respondents (white/Caucasian, Asian/Asian American, South  
476 Asian/South East Asian, Black/African American, Hispanics/Latinos, Middle Eastern,  
477 Native American/Alaska Native, and Pacific Islander/Hawaiian Native), and a more  
478 consolidated one classifying samples in three groups (underrepresented minority (URM):  
479 Black/African American, Hispanics/Latinos, Native American/Alaska Native, and Pacific

480 Islander/Hawaii Native); Asians (Asian/Asian American and South Asian/SouthEast  
481 Asian); and white (white/Caucasian and Middle Eastern)).

482 Non-respondents were removed before each analysis. To assess differences, we  
483 used either ordinal logistic regression in the presence of ordinal dependent variables  
484 (using the R package “MASS”) or Chi-square test in the presence of categorical data  
485 (basic R function). We considered p-values <0.05 to be significant. In the manuscript, p-  
486 values of <0.05 were identified as \*, p<0.01 \*\* and p<0.001 \*\*\*. Word clouds were  
487 generated in Python using the wordcloud package. Figures were generated using Python  
488 version 3.7.6.

489

## 490 **Acknowledgements**

491 We thank Dr. Valerie Miller (UIC) for her assistance with the 2019 survey instrument  
492 design and dissemination; the Future of Research directors for suggesting the inclusion  
493 of mental health and wellness queries in the survey; and we are especially grateful to  
494 Drs. Erin Heckler (Yale University) and Imogen Hurley (UW Madison) for valuable  
495 comments. We are very grateful to the many Postdoctoral Associations, administrators,  
496 faculty directors, and others who helped distribute our survey to postdocs across the  
497 country. Finally, we wish to especially express our gratitude to the postdocs who shared  
498 their experiences with us by participating in the surveys.

499

## 500 **Ethics**

501 Human subjects: Participation in this survey was completely voluntary. In the  
502 introduction to this survey, we informed the participants of its purpose, and that results  
503 of the survey would be disseminated, in aggregate. All responses were recorded in a

504 secure RedCap Database, so they could not be traced back to individual respondents.  
505 Responses were combined for data analysis to maintain respondent anonymity  
506 throughout data analysis. Our survey design and dissemination protocol was approved  
507 by the University of Chicago Institutional Review Board, IRB Protocol Number 15-1724.

508

### 509 **Data Availability**

510 Non-privileged data used in this study are available in supplemental tables and  
511 additional material related to this manuscript. Due to their sensitive nature, much of the  
512 raw data is privileged to prevent individual identification in accordance with IRB  
513 protocol. However, summary data for institutions, fields, and regions with more than 50  
514 respondents are available upon request.

515

### 516 **Author details**

517 Andr anne Morin is in the Department of Human Genetics, University of Chicago,  
518 Chicago, IL.

519 Contribution: Conceptualization, Methodology, Formal analysis, Investigation, Writing –  
520 original draft preparation, Writing – review & editing, Visualization

521 For correspondence: [amorin@uchicago.edu](mailto:amorin@uchicago.edu)

522 Competing interests: None

523

524 Britney A. Helling is in the Department of Human Genetics, University of Chicago,  
525 Chicago, IL.



526 Contribution: Conceptualization, Methodology, Formal analysis, Writing – original draft  
527 preparation; Writing – review & editing

528 Competing interests: None

529

530 Seetha Krishnan is in the Department of Neurobiology and Institute for Neuroscience,  
531 University of Chicago, Chicago, IL.

532 Contribution: Conceptualization, Methodology, Formal analysis, Investigation,  
533 Visualization, Writing – original draft preparation, Writing - review & editing

534 Competing interests: None

535

536 Laurie E. Risner is in the Department of Pediatrics, University of Chicago, Chicago, IL.

537 Contribution: Conceptualization; Methodology; Writing – original draft preparation;  
538 Writing – review & editing; Project administration

539 Competing interests: None.

540

541 Nykia D. Walker is in the Ben May Department for Cancer Research, University of  
542 Chicago, Chicago, IL.; current affiliation: the University of Maryland, Baltimore County

543 Contribution: Writing-review & editing

544 Competing interests: None

545

546 Nancy B. Schwartz is in the Department of Pediatrics and the Department of  
547 Biochemistry and Molecular Biology, University of Chicago, Chicago, IL.

548 Contribution: Conceptualization; Methodology; Investigation; Writing – original draft

549 preparation; Writing – review & editing; Visualization; Supervision; Project

550 administration

551 Competing interests: None

552 For correspondence: [n-schwartz@uchicago.edu](mailto:n-schwartz@uchicago.edu)

553

554 **Funding**

555 AM was supported by the Fond de recherche du Québec en Santé (FRQS) postdoctoral

556 fellowship. SK was funded by T32 (Grant Number T32DA043469) from the National

557 Institute on Drug Abuse

## References

1. National Research Council. The Invisible University: Postdoctoral Education in the United States. Report of a Study Conducted Under the Auspices of the National Research Council. [Richard B. Curtis, Study Director]. (The National Academies Press, 1969). doi:10.17226/18693.
2. Shen, H. Employee benefits: Plight of the postdoc. *Nature* **525**, 279–281 (2015).
3. Ålund, M. et al. Academic ecosystems must evolve to support a sustainable postdoc workforce. *Nat Ecol Evol* **4**, 777–781 (2020).
4. Andersen, J. P., Nielsen, M. W., Simone, N. L., Lewiss, R. E. & Jagsi, R. COVID-19 medical papers have fewer women first authors than expected. *eLife* **9**, e58807 (2020).
5. National Academies of Sciences, Engineering, and Medicine. The Impact of COVID-19 on the Careers of Women in Academic Sciences, Engineering, and Medicine. (The National Academies Press, 2021). doi:10.17226/26061.
6. Krukowski, R. A., Jagsi, R. & Cardel, M. I. Academic Productivity Differences by Gender and Child Age in Science, Technology, Engineering, Mathematics, and Medicine Faculty During the COVID-19 Pandemic. *Journal of Women's Health* **30**, 341–347 (2021).
7. Myers, K. R. et al. Unequal effects of the COVID-19 pandemic on scientists. *Nat Hum Behav* **4**, 880–883 (2020).
8. American Educational Research Association et al. Voices from the field: The impact of COVID-19 on early career scholars and doctoral students. <https://www.aera.net/Education-Research/Voices-from-the-Field-The-Impact-of->

COVID-19-on-Early-Career-Scholars-and-Doctoral-Students (2021)

doi:10.3102/aera20211.

9. Jagsi, R., Fuentes-Afflick, E. & Higginbotham, E. Promoting Equity for Women in Medicine — Seizing a Disruptive Opportunity. *New England Journal of Medicine* (2021) doi:10.1056/NEJMp2104228.
10. Maital, S. The Global Economic Impact of COVID-19. 12.
11. Gao, J., Yin, Y., Myers, K. R., Lakhani, K. R. & Wang, D. Potentially long-lasting effects of the pandemic on scientists. *Nat Commun* **12**, 6188 (2021).
12. Doyle, J. M. et al. The impact of the COVID-19 pandemic on underrepresented early-career PhD and physician scientists. *Journal of Clinical and Translational Science* **5**, (2021).
13. Korbel, J. O. & Stegle, O. Effects of the COVID-19 pandemic on life scientists. *Genome Biology* **21**, 113 (2020).
14. Carr, R. M. et al. Academic careers and the COVID-19 pandemic: Reversing the tide. *Science Translational Medicine* **13**, eabe7189 (2021).
15. Pandemic Cost NIH \$16 Billion in Delayed, Lost Medical Research.  
<https://news.bloomberglaw.com/pharma-and-life-sciences/pandemic-cost-nih-16-billion-in-delayed-lost-medical-research>.
16. A Brutal Tally: Higher Ed Lost 650,000 Jobs Last Year.  
<https://www.chronicle.com/article/a-brutal-tally-higher-ed-lost-650-000-jobs-last-year>.

17. Colleges Have Shed a Tenth of Their Employees Since the Pandemic Began.

<https://www.chronicle.com/article/colleges-have-shed-a-tenth-of-their-employees-since-the-pandemic-began>.

18. Woolston, C. Junior researchers hit by coronavirus-triggered hiring freezes. *Nature* **582**, 449–450 (2020).

19. Woolston, C. Uncertain prospects for postdoctoral researchers. *Nature* **588**, 181–184 (2020).

20. McConnell, S. C., Westerman, E. L., Pierre, J. F., Heckler, E. J. & Schwartz, N. B. United States National Postdoc Survey results and the interaction of gender, career choice and mentor impact. *eLife* **7**, e40189 (2018).

21. Davis G. Doctors without orders. *American Scientist*.  
<http://postdoc.sigmaxi.org/results/>. (2005).

22. Gardner, M. E., Bodiya, E. C. & Subramanian, S. Remote Learning Barriers and Opportunities for Graduate Student and Postdoctoral Learners in Career and Professional Skill Development: A Case Study†. *Journal of Microbiology & Biology Education* **22**, ev22i1.2451.

23. Aubry, L. M., Laverty, T. M. & Ma, Z. Impacts of COVID-19 on ecology and evolutionary biology faculty in the United States. *Ecological Applications* **31**, e2265 (2021).

24. Seitz, B. M. et al. The pandemic exposes human nature: 10 evolutionary insights. *PNAS* **117**, 27767–27776 (2020).

25. Deryugina, T., Shurchkov, O. & Stearns, J. E. COVID-19 Disruptions Disproportionately Affect Female Academics. <https://www.nber.org/papers/w28360> (2021) doi:10.3386/w28360.
26. Postdocs need urgent financial support amid COVID conditions. *Nature* **588**, 8–8 (2020).
27. Park, D. S. The Invisible University Is COVID-19 Positive. *Trends in Genetics* **36**, 543–544 (2020).

## Graphical Abstract

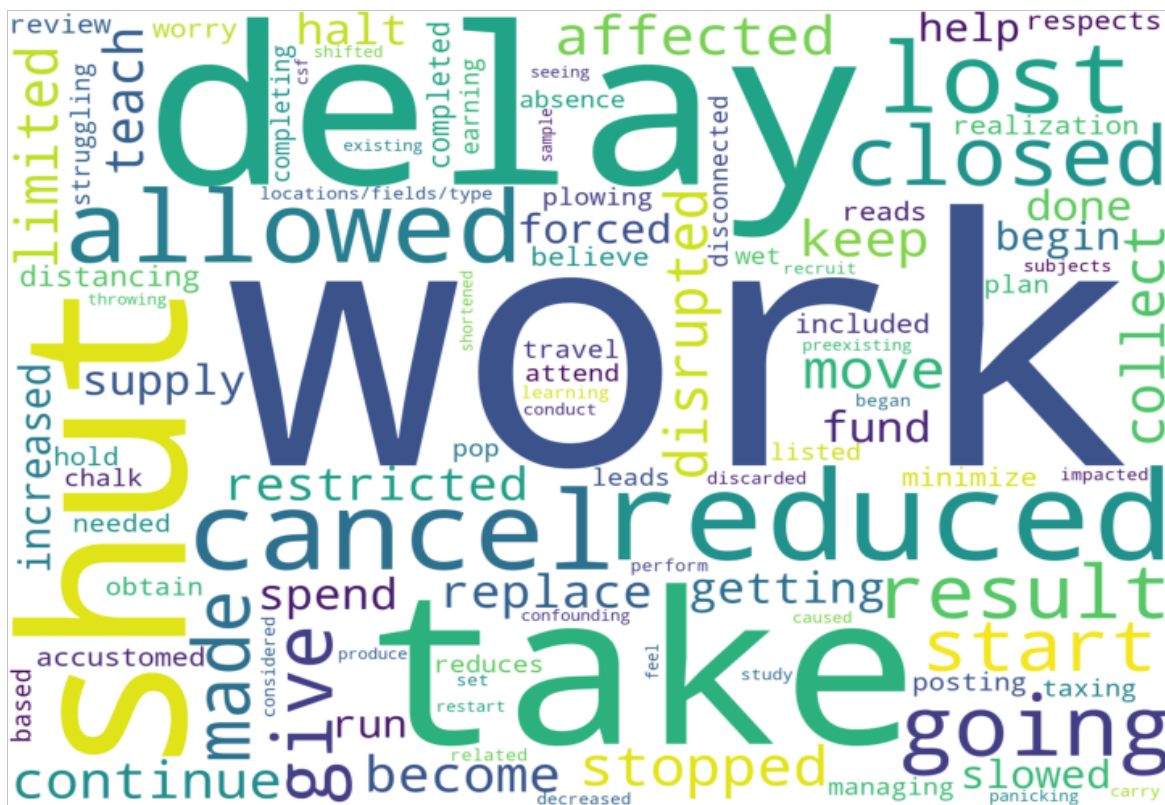

Graphical Abstract of survey responses to: Why or how has your research been disrupted or not disrupted due to the pandemic? Overall, postdocs responded with feelings of loss of control as the pandemic was acting upon them and taking away their ability to complete their work.

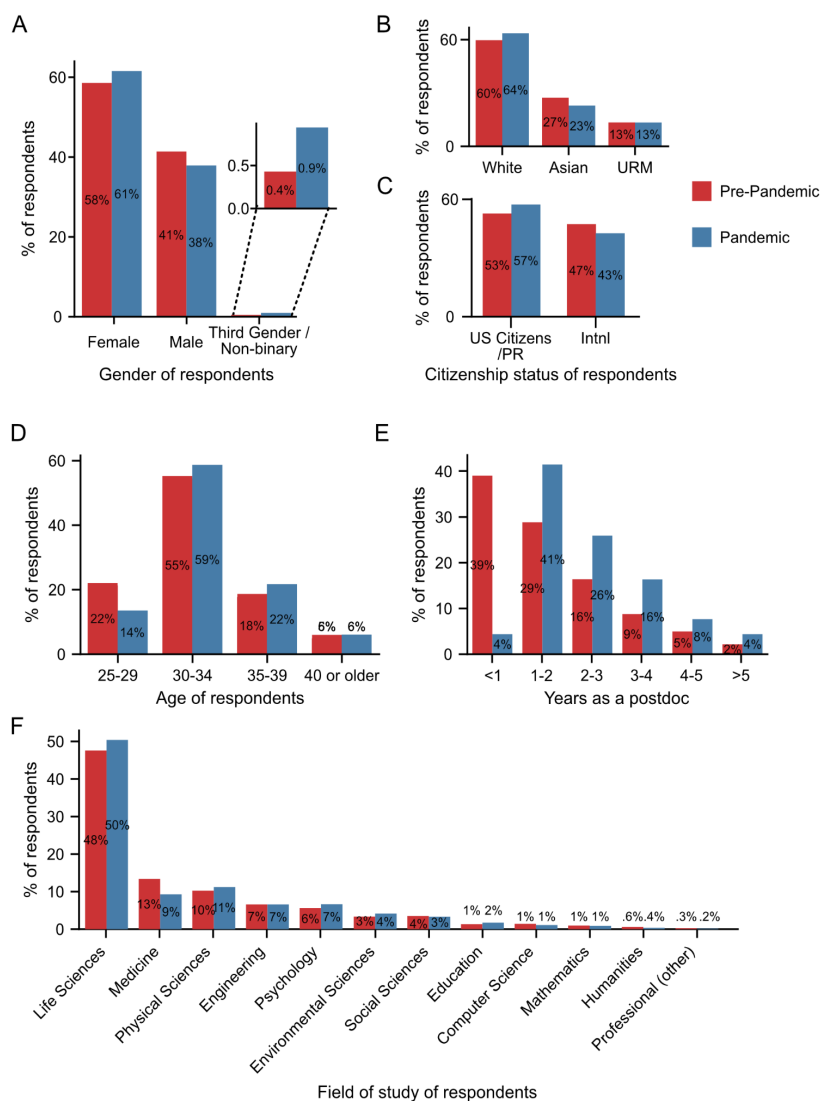

**Figure 1: Pre-pandemic and pandemic survey demographics.**

**A.** More self-identified female and third gender/non-binary and fewer self-identified male respondents completed the pandemic survey (n=1,698) compared to the pre-pandemic survey (n=5,805; Chi-squared test,  $p=0.0023$ ,  $\chi^2 = 12.2$ ). **B.** The majority of respondents were white in both the pre-pandemic (n=5,649) and pandemic surveys (n=1,673), with an increase in white and a decrease in Asian respondents in the pandemic survey compared to the pre-pandemic survey (Chi-squared test,  $p=0.0024$ ,  $\chi^2 = 12.1$ ). **C.** The proportion of US citizens/PR respondents increased (Chi-squared test,  $p=0.0015$ ,  $\chi^2 = 10.1$ ; n pre-pandemic=5,813; n pandemic=1,702). **D-E.** As expected, the age of respondents (Chi-squared test,  $p=3.6 \times 10^{-14}$ ,  $\chi^2 = 65.7$ ; n pre-pandemic=5,825; n pandemic=1,714 ) (**D**) and the years of postdoc experience (Chi-squared test,  $p=4.3 \times 10^{-161}$ ,  $\chi^2 = 755.8$ ; n pre-pandemic=5,853; n pandemic=1,715) (**E**) both increased as we conducted the pandemic survey with a subset of the pre-pandemic respondents almost one year after the initial survey. **F.** The majority of respondents were in the life sciences with a statistically significant decrease in responses from those in the field of medicine in the pandemic survey (n=1,712) compared to the pre-pandemic survey (n=5,922; Chi-squared test,  $p=0.0012$ ,  $\chi^2 = 32.47$ ). PR: Permanent resident. Additional demographic information from the two surveys is shown in **Figure 1-figure supplement 1**



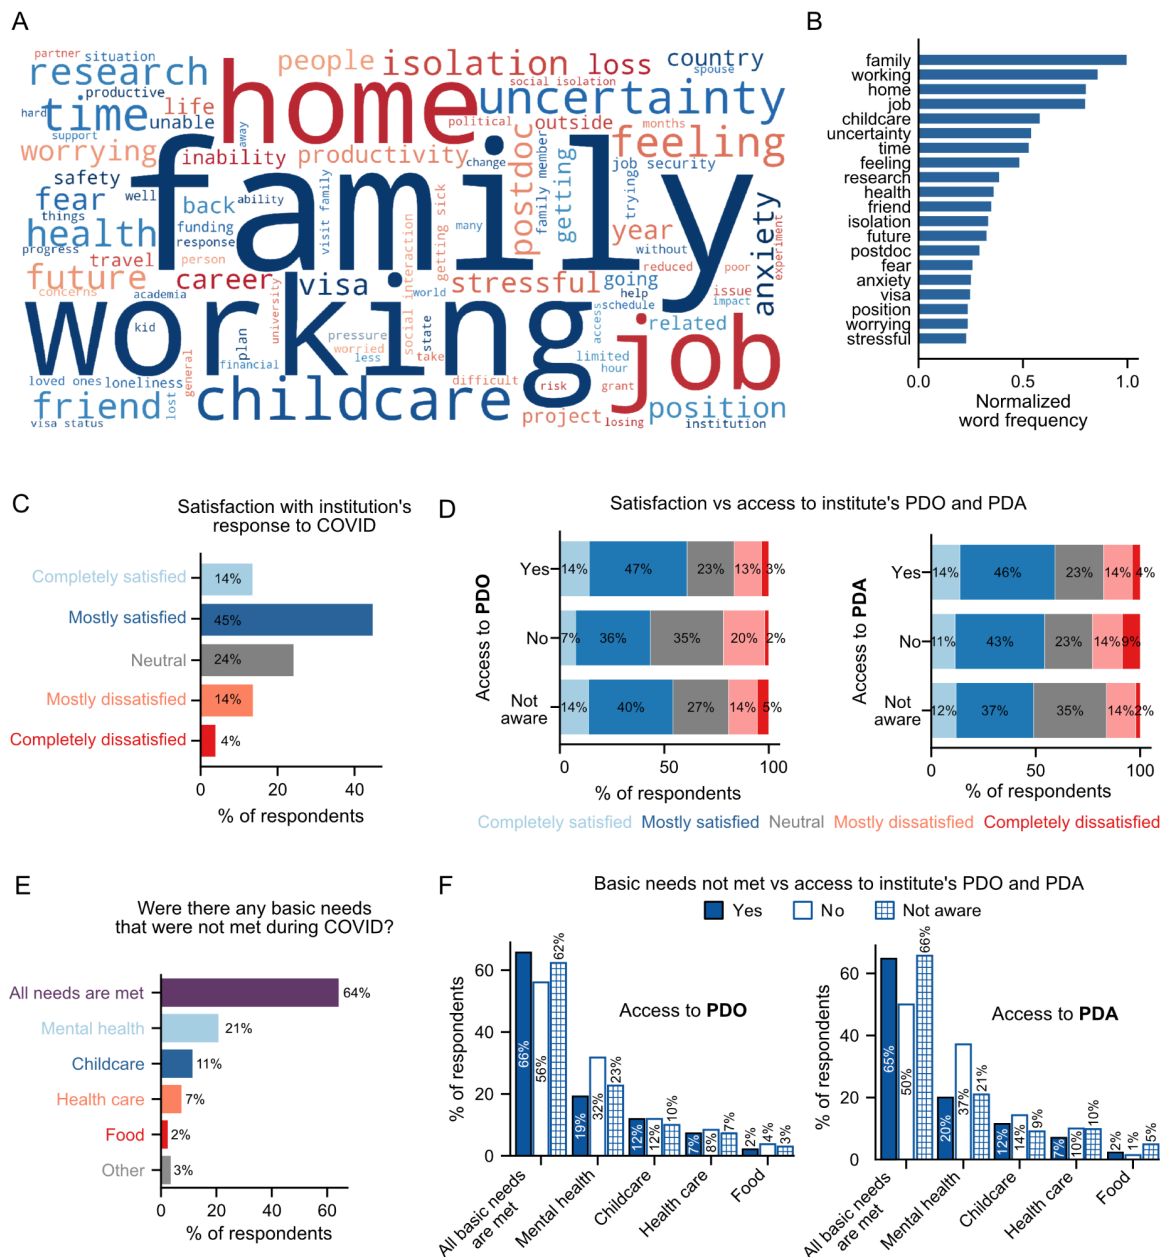

**Figure 2: Impact of the pandemic on postdocs and effect of institutional support.**

**A-B.** Word cloud of postdocs' main stressors during the COVID-19 pandemic (**A**) and distribution of the most frequently used words (**B**). **C.** Satisfaction with the institution's response to COVID-19 (n=1,718). **D.** Satisfaction with the institution's response to COVID-19 was higher in postdocs that had access to a PDO compared to the ones that did not (ordinal logistic regression OR=1.75 [95% CI; 1.23-2.48], p=0.0018) or those unaware whether their institution had a PDO (ordinal logistic regression OR=1.24 [95% CI; 1.01-1.53], p=0.044; n=1,700). No significant differences were observed by access to PDA (n=1,707). **E.** Basic needs that were not met during the pandemic (n=1,676). See **Figure 2—figure supplement 1** for breakdown by race/ethnicity groups. **F.** Having access to a PDO significantly impacted having mental health needs met (Chi-squared test, p=0.005,  $\chi^2 = 10.6$ , n=1,660). Having access to a PDA significantly impacted having all their basic needs (Chi-squared test, p=0.039,  $\chi^2 = 6.5$ ) or meeting their mental health needs (Chi-squared test, p=0.0026,  $\chi^2 = 11.9$ ; n=1,665).

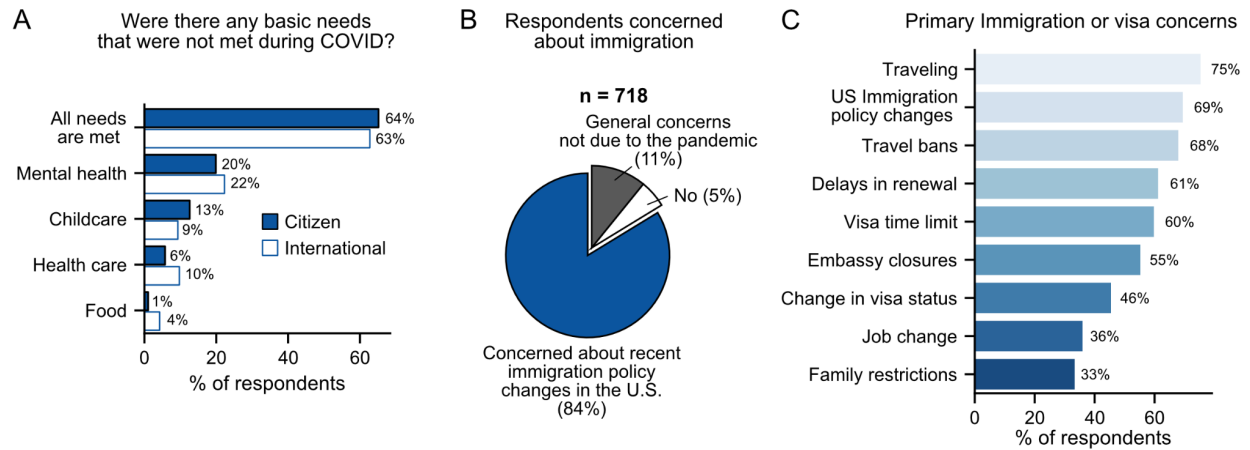

### Figure 3: Impact of COVID-19 on international postdocs

**A.** Citizenship status had a significant impact on health care (Chi-squared test,  $p=0.0023$ ,  $\chi^2 = 9.3$ ), childcare (Chi-squared test,  $p=0.035$ ,  $\chi^2 = 4.4$ ) and food (Chi-squared test,  $p=1.8 \times 10^{-5}$ ,  $\chi^2 = 9.3$ ) basic needs that were left unmet during the pandemic ( $n=1,657$ ). **B.** International postdocs' concerns about immigration and visa ( $n=718$ ). **C.** Primary immigration or visa concerns ( $n=718$ ). See **Figure 3-figure supplement 1** for breakdown of immigration concerns by gender.

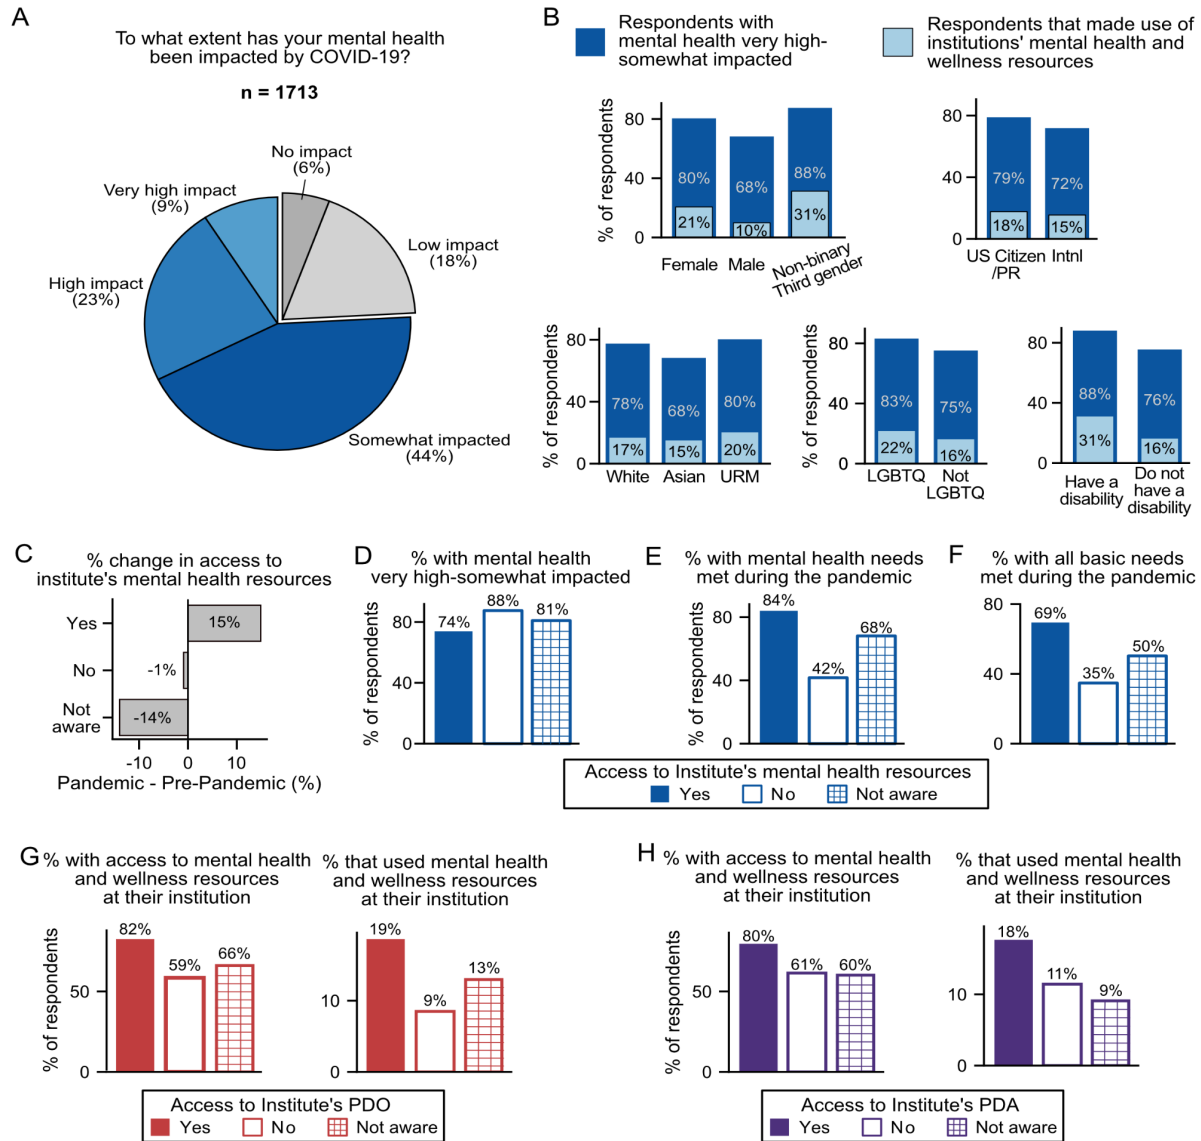

**Figure 4: Impact of COVID-19 on mental health.**

**A.** The majority of survey respondents stated that COVID-19 had impacted their mental health while only 6% stated that it had no impact (n=1,713). **B.** Although most surveyed postdocs stated that their mental health was impacted (very higher impact, high impact, and somewhat impacted), a minority of these postdocs utilized mental health and wellness resources provided by their institution. Females and non-binary/Third gender had more impact than males (n=1,691; ordinal logistic regression OR=0.51,[95% CI:0.43-0.62],p= 1.95e-12 and OR=0.30[95% CI:0.12-0.74],p=0.0085 respectively) and used more institutional resources (Chi-squared test p=2.46x10<sup>-8</sup>,  $\chi^2$ =35.04), US Citizens/PR reported a greater impact on mental health than International postdocs (n=1,693; ordinal logistic regression, p= 0.0022, OR=1.32[95% CI:1.11-1.58]). Asian postdocs had less impact compared to white (n=1,667; ordinal logistic regression, p= 6.88e-6, OR=0.61,[95% CI:0.49-0.75]) and URM (ordinal logistic regression, p= 1.04x10<sup>-4</sup>, OR=0.54,[95% CI:0.40-0.74]). LGBTQ community (n=1,682; ordinal logistic regression, p= 3.28x10<sup>-5</sup>, OR=2.02,[95% CI:1.45-2.81]) and postdocs with disabilities (n=1,682; ordinal logistic regression, p= 9.66x10<sup>-5</sup>, OR=3.09, [95% CI:1.75-5.44]) reported higher impact on their mental health. Postdocs with

disabilities also used more institutional resources (Chi-squared test,  $p=0.024$ ,  $\chi^2 = 5.11$ ) **C.** During the pandemic, more individuals had access to mental health resources, which was reflected in an increased awareness of these resources available at their institution (Chi-squared test,  $p=3.8 \times 10^{-30}$ ,  $\chi^2 = 135.5$ ;  $n$  pre-pandemic=5,795,  $n$  pandemic=1,713). That increase in awareness is proportional to the increase in respondents stating that their institution has available mental health resources. **D.** Having access (ordinal logistic regression,  $p= 3.54 \times 10^{-6}$ , OR=2.83, [95% CI:1.83-4.40]), or being aware of (ordinal logistic regression,  $p= 0.011$ , OR=1.34, [95% CI:1.07-1.67]) mental health resources reduced mental health impact during COVID-19 ( $n=1,710$ ). **E.** A larger portion of postdocs having access to mental health resources had their mental health basic needs met (Chi-squared test,  $p=2.18 \times 10^{-23}$ ,  $\chi^2 = 104.36$ ;  $n=1,722$ ). **F.** A larger portion of postdocs having access to mental health resources had all their basic needs met (Chi-squared test,  $p=6.78 \times 10^{-16}$ ,  $\chi^2 = 69.86$ ;  $n=1,722$ ). See **Figure 4–figure supplement 1A** for other basic needs unmet vs access to mental health resources. **G and H.** Having access to a PDO or a PDA increased access to (PDO (Chi-squared test,  $p=6.66 \times 10^{-24}$ ,  $\chi^2 = 114.87$ ;  $n=1,697$ ); PDA (Chi-squared test,  $p=1.39 \times 10^{-14}$ ,  $\chi^2 = 71.01$ ;  $n=1,703$ )) and the use (PDO (Chi-squared test,  $p=0.002$ ,  $\chi^2 = 12.32$ ;  $n=1,694$ ); PDA(Chi-squared test,  $p=0.016$ ,  $\chi^2 = 8.29$ ;  $n=1,699$ )) of mental health resources.

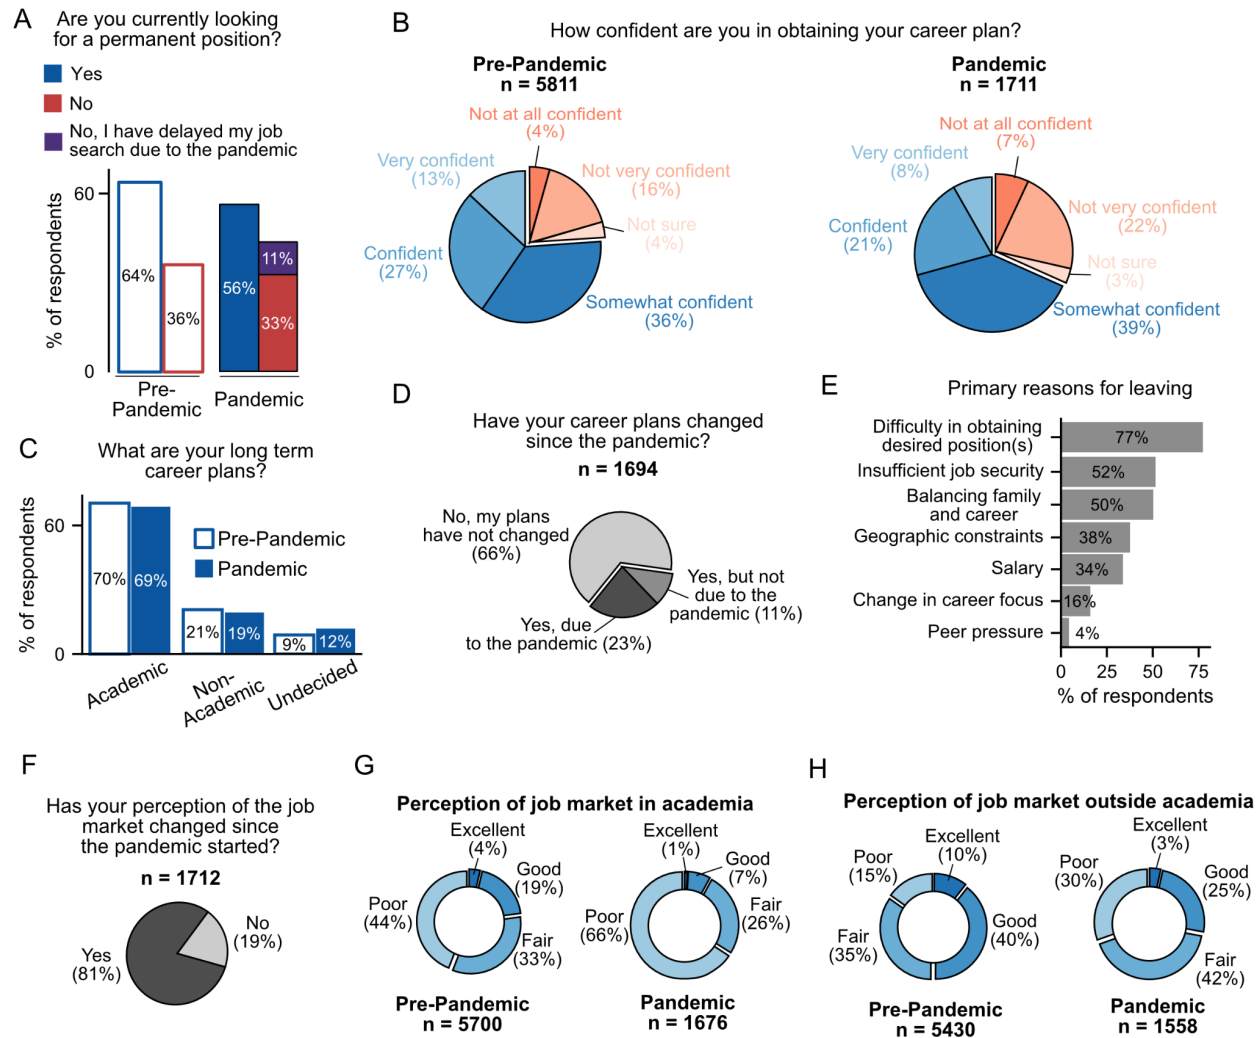

**Figure 5: The effect of COVID-19 on career trajectories of postdocs.**

**A.** Fewer postdocs are actively looking for a permanent position ( $n=1,704$ ) than before the pandemic ( $n=5,676$ ; Chi-squared test,  $p=2.1 \times 10^{-8}$ ,  $\chi^2 = 31.39$ ). See **Figure 5-figure supplement 1A** for breakdown by type of position. **B.** Postdocs are less confident in their ability to obtain their desired career since the start of the pandemic (ordinal logistic regression,  $p=1.58 \times 10^{-20}$ ,  $OR=0.62$ , [95% CI:0.56-0.69];  $n$  pre-pandemic=5,811,  $n$  pandemic=1,711). **C.** The long-term goals of postdocs have not shifted during the pandemic. However, a larger proportion of postdocs are now uncertain about their career trajectories (Chi-squared test,  $p=0.0022$ ,  $\chi^2 = 41.3$ ;  $n$  pre-pandemic=5,746,  $n$  pandemic=1,716). **D.** 34% of postdocs indicated that their career plans changed since the pandemic started ( $n=1,694$ ). **E.** Primary reasons for changes in career trajectory ( $n=388$ ). See **Figure 5-figure supplement 1B-C** for breakdown by citizenship status and race/ethnicity. **F.** During the pandemic, the perception of both the academic and non-academic job markets has declined ( $n=1,712$ ). See **Figure 5-figure supplement 1D-E** for breakdown by citizenship status and race/ethnicity. **G.** A decrease in the perception of the job market both in (ordinal logistic regression,  $p=2.32 \times 10^{-63}$ ,  $OR=0.39$ , [95% CI:0.35-0.43]; pre-pandemic=5,700,  $n$  pandemic=1,676) and **H.** outside (ordinal logistic regression,  $p=6.5 \times 10^{-70}$ ,  $OR=0.39$ , [95% CI:0.35-0.43]; pre-pandemic=5,430,  $n$  pandemic=1,558) academia was observed during the pandemic compared to the pre-pandemic survey.

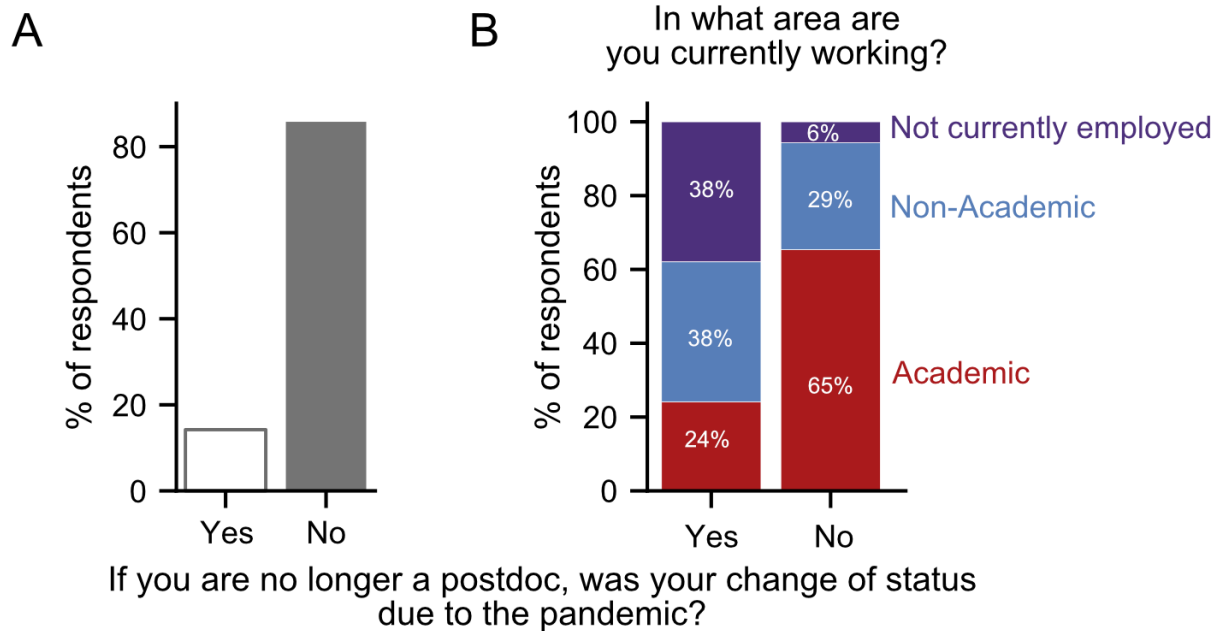

**Figure 6: Career transitions made during the pandemic.**

**A.** 14% of respondents who indicated that they are no longer a postdoc, stated that their transition was a consequence of the pandemic (n=218). **B.** Postdocs who transitioned due to the pandemic were more likely to be unemployed (purple) and less likely to have an academic position (red) than postdocs whose transition was not a consequence of the pandemic (Chi-squared test,  $p=6.69 \times 10^{-8}$ ,  $\chi^2 = 33.04$ ; n=205).

**Table 1. Responses to open-ended questions on pandemic-related stresses and impact on research productivity**

| Mental Health                                                                                                                                                                                                                                                                                                                                                                                                                               |
|---------------------------------------------------------------------------------------------------------------------------------------------------------------------------------------------------------------------------------------------------------------------------------------------------------------------------------------------------------------------------------------------------------------------------------------------|
| Uncertainty in my health, uncertainty in my partner's health, anxiety about leaving home, anxiety about how this will affect my future, depression and grievance of lost sense of "normal", lack of social interaction with others, can't visit family for foreseeable [ <i>sic</i> ] future, lack of sufficient space to work from home productively, stress of fighting institutionalized racism, anxiety over changing career prospects. |
| Loss of morale, loss of collegial atmosphere, perception that the world is going to end, chronic anxiety about the US political situation, minority stress, worry about the health of family members, realization that working alone is terrible for my mental health, realization that nobody reads academic articles and nobody respects the professoriate, realization that the general public does not believe in science or truth.     |
| My mental health has suffered as a consequence of being alone all the time making research more difficult....                                                                                                                                                                                                                                                                                                                               |
| ...the extra stressors associated with the pandemic have significantly affected my mental health and ability to work effectively.                                                                                                                                                                                                                                                                                                           |
| ...The pandemic has also taken a huge toll on my mental health which has disrupted my focus and ability to get research done.                                                                                                                                                                                                                                                                                                               |
| Immigration/ International postdocs                                                                                                                                                                                                                                                                                                                                                                                                         |
| The government released multiple rules controlling the H1-B visa of foreign workers, which make it harder for us foreigners in the job market.                                                                                                                                                                                                                                                                                              |
| 1. Family getting sick and dying back home in India due to COVID-19, 2. Immigration restrictions by the government, 3. Slow pace of immigration application procedures by USCIS and US Embassies...                                                                                                                                                                                                                                         |
| As I a [ <i>sic</i> ] here in the US alone. My stress came from being worried about my family back in my country. and in experiencing this pandemic nearly all alone.                                                                                                                                                                                                                                                                       |
| Having the pandemic eat into the limited amount of time I have as a postdoc here. Also being unable to travel - due to the travel ban, I cannot return home to see family (e.g. for Christmas) because I wouldn't be able to get back into the US.                                                                                                                                                                                          |
| I was stuck in Europe for 6 months due to immigration issues (expired visa and closed embassies) and therefore was not able to do any lab work.                                                                                                                                                                                                                                                                                             |
| Relationship with PI                                                                                                                                                                                                                                                                                                                                                                                                                        |
| I have been working from home, which has led to a drop in productivity. However, my PI expects me to be more productive due to "a lack of distractions." This disparity is making progress difficult....                                                                                                                                                                                                                                    |

|                                                                                                                                                                                                                                                                                                                 |
|-----------------------------------------------------------------------------------------------------------------------------------------------------------------------------------------------------------------------------------------------------------------------------------------------------------------|
| Personally, my research has been disrupted by the constant pressure by my PI and my Institution to continue to work in lab during a pandemic. I don't feel safe working around so many people, and my complaint has been ignored by my PI and the Institution. This has caused me a lot of stress and anxiety.  |
| ... My supervisors also fell off of the map and we had almost zero contact throughout the lockdown (March - June) until we could return to the lab. Then after, the communication is still minimal and it's unclear what the status of publications are.                                                        |
| My PI became very micromanaging, in stark contrast to her hands-off style previously. They put a lot of pressure on me to publish and be productive during the pandemic.                                                                                                                                        |
| Unrealistic expectations of the PI who ignored/ignores the fact that there is a pandemic and that the pandemic has an impact on research progress. First, the lab was shut down and then reopened with 25% capacity at a time.                                                                                  |
| <b>Career/job perspectives</b>                                                                                                                                                                                                                                                                                  |
| Uncertainty/Instability in the job market as I try to find a job... Poor postdoc pay relative to the job market for my degree & experience level.                                                                                                                                                               |
| ... Feeling like industry/private sector is not going to be any easier to find employment in than academia with such high unemployment rates ...                                                                                                                                                                |
| That my project is getting behind and I will not be able to apply for grants within the window of "early career"/trainee grants.                                                                                                                                                                                |
| Lack of career perspective and being unable to do my research during the final years of my postdoc.                                                                                                                                                                                                             |
| <b>Research Productivity</b>                                                                                                                                                                                                                                                                                    |
| I was expected to continue producing lab work while the labs were closed down! My PI encouraged me to break quarantine rules and continue work.                                                                                                                                                                 |
| Lack of research output leading to fears of my career being over.                                                                                                                                                                                                                                               |
| The feeling of guilt has been overwhelming. I feel like I should be doing more, but I really can't because I don't have the resources needed (e.g. mice) to do my research.                                                                                                                                     |
| ... trying to find new ways of ensuring/displaying productivity. I couldn't produce experimental results so how do represent the work that I've actually been getting done during this time. and [sic] then upon start-up, are they actually concerned and keeping student/worker safety as their primary goal. |
| <b>Family/Childcare</b>                                                                                                                                                                                                                                                                                         |
| Lockdown forced to ramp-down research to the bare minimum. Childcare restrictions have                                                                                                                                                                                                                          |



also impacted the amount of time that I can spend in the lab. Taking care of a toddler at home does not favor literature research.

An inability to balance work with childcare. My wife worked full or nearly full-time throughout the pandemic, and as a result, the bulk of childcare fell on me because I had a more flexible schedule and understanding PI. I constantly felt pressure and stress to accomplish research goals but consistently was unable to achieve anything because my children's welfare was top priority.

Lack of childcare for my school-age child. Non-COVID health concerns for my household members and paying for co-insurance and copays with the terrible insurance of my institution. My husband is unemployed and can't find safe work and we are financially struggling.

Loss of productivity due to loss of childcare, feeling like I am slipping behind my colleagues without children. Lots of stress and pressure around keeping up with tasks. Unable to start any new, exciting projects that would help my career due to childcare loss.

Trying to work from home while caring for my children; it's like normal working mom guilt, but on steroids. Also, the university permanently closed the childcare center on campus (one of the best centers in the area) where our children went, so the uncertainty of being able to find quality childcare once centers reopened was exceptionally stressful.

## **Supplementary Information**

### **Table of contents**

- 1. Supplementary file 1: Pre-pandemic survey questionnaire**
- 2. Supplementary file 2: Pandemic survey questionnaire**
- 3. Supplementary file 3: Race and ethnicity distribution among respondents of the pre-pandemic and pandemic survey.**
- 4. Figure 1–figure supplement 1. Comparison of demographics between pandemic and pre-pandemic surveys.**
- 5. Figure 2–figure supplement 1. Basic needs not met by race/ethnicity groups.**
- 6. Figure 3–figure supplement 1. Immigration concerns by gender.**
- 7. Figure 4–figure supplement 1. Effect of institutional resources on having mental health needs met.**
- 8. Figure 5–figure supplement 1. Change in career plans broken down by demographics.**

**Supplementary file 3: Race and ethnicity distribution among respondents of the pre-pandemic and pandemic survey.**

| <b>Pandemic Survey</b>                      |                     |                         |                                   |                                  |                                           |                   |                                             |                                          |
|---------------------------------------------|---------------------|-------------------------|-----------------------------------|----------------------------------|-------------------------------------------|-------------------|---------------------------------------------|------------------------------------------|
|                                             | Hispanic/<br>Latino | White/<br>Caucasia<br>n | Black/<br>African<br>America<br>n | Asian /<br>Asian<br>America<br>n | South<br>Asian/<br>South<br>East<br>Asian | Middle<br>Eastern | Native<br>American<br>/<br>Alaska<br>Native | Pacific<br>Islander/<br>Hawaii<br>Native |
| Hispanic/<br>Latino                         | 89<br>(5.17%)       | 62<br>(3.6%)            | 11<br>(0.64%)                     | 2<br>(0.12%)                     | 0 (0%)                                    | 0 (0%)            | 3 (0.17%)                                   | 0 (0%)                                   |
| White/<br>Caucasia<br>n                     |                     | 1016<br>(59%)           | 5<br>(0.29%)                      | 19<br>(1.1%)                     | 2<br>(0.12%)                              | 21<br>(1.22%)     | 11<br>(0.64%)                               | 0 (0%)                                   |
| Black/<br>African<br>America<br>n           |                     |                         | 31<br>(1.8%)                      | 0 (0%)                           | 0 (0%)                                    | 0 (0%)            | 0 (0%)                                      | 0 (0%)                                   |
| Asian /<br>Asian<br>America<br>n            |                     |                         |                                   | 281<br>(16.32%)                  | 11<br>(0.64%)                             | 2<br>(0.12%)      | 0 (0%)                                      | 3<br>(0.17%)                             |
| South<br>Asian/<br>South<br>East<br>Asian   |                     |                         |                                   |                                  | 69<br>(4.01%)                             | 0 (0%)            | 0 (0%)                                      | 0 (0%)                                   |
| Middle<br>Eastern                           |                     |                         |                                   |                                  |                                           | 27<br>(1.57%)     | 0 (0%)                                      | 0 (0%)                                   |
| Native<br>America<br>n/<br>Alaska<br>Native |                     |                         |                                   |                                  |                                           |                   | 0 (0%)                                      | 0 (0%)                                   |
| Pacific<br>Islander/<br>Hawaii<br>Native    |                     |                         |                                   |                                  |                                           |                   |                                             | 0 (0%)                                   |
| Total*                                      | 174                 | 1144                    | 51                                | 319                              | 82                                        | 52                | 17                                          | 4                                        |
| <b>Pre-pandemic survey</b>                  |                     |                         |                                   |                                  |                                           |                   |                                             |                                          |

|                                           | Hispanic/<br>Latino | White/<br>Caucasia<br>n | Black/<br>African<br>America<br>n | Asian /<br>Asian<br>America<br>n | South<br>Asian/<br>South<br>East<br>Asian | Middle<br>Eastern | Native<br>American<br>/<br>Alaska<br>Native | Pacific<br>Islander/<br>Hawaii<br>Native |
|-------------------------------------------|---------------------|-------------------------|-----------------------------------|----------------------------------|-------------------------------------------|-------------------|---------------------------------------------|------------------------------------------|
| Hispanic/<br>Latino                       | 312<br>(5.11%)      | 188<br>(3.08%)          | 13<br>(0.21%)                     | 4<br>(0.07%)                     | 0 (0%)                                    | 0 (0%)            | 3 (0.05%)                                   | 0 (0%)                                   |
| White/<br>Caucasia<br>n                   |                     | 3190<br>(52.20%)        | 19<br>(0.3%)                      | 55<br>(0.90%)                    | 7<br>(0.11%)                              | 74<br>(1.21%)     | 18<br>(0.29%)                               | 1<br>(0.02%)                             |
| Black/<br>African<br>America<br>n         |                     |                         | 131<br>(2.14%)                    | 1<br>(0.02%)                     | 0 (0%)                                    | 1<br>(0.02%)      | 0 (0%)                                      | 0 (0%)                                   |
| Asian /<br>Asian<br>America<br>n          |                     |                         |                                   | 1151<br>(18.83%)                 | 29<br>(0.47%)                             | 0 (0%)            | 0 (0%)                                      | 9<br>(0.15%)                             |
| South<br>Asian/<br>South<br>East<br>Asian |                     |                         |                                   |                                  | 291<br>(4.76%)                            | 0 (0%)            | 0 (0%)                                      | 1<br>(0.02%)                             |
| Middle<br>Eastern                         |                     |                         |                                   |                                  |                                           | 124<br>(2.03%)    | 0 (0%)                                      | 0 (0%)                                   |
| Native<br>America<br>n/ Alaska<br>Native  |                     |                         |                                   |                                  |                                           |                   | 2 (0.03%)                                   | 0 (0%)                                   |
| Pacific<br>Islander/<br>Hawaii<br>Native  |                     |                         |                                   |                                  |                                           |                   |                                             | 1<br>(0.02%)                             |
| Total*                                    | 535                 | 3570                    | 176                               | 1258                             | 332                                       | 206               | 30                                          | 14                                       |

In the pandemic survey, 49 (2.85%) respondents did not identify any race or ethnicity and 8 (0.46%) respondents identified  $\geq 3$  races or ethnicities. In the pre-pandemic survey, considering only US Postdocs, 301 (4.8%) respondents did not identify any race or ethnicity and 25 (0.4%) respondents identified  $\geq 3$  races or ethnicities. \* Number of individual who identify to each ethnicity/race.

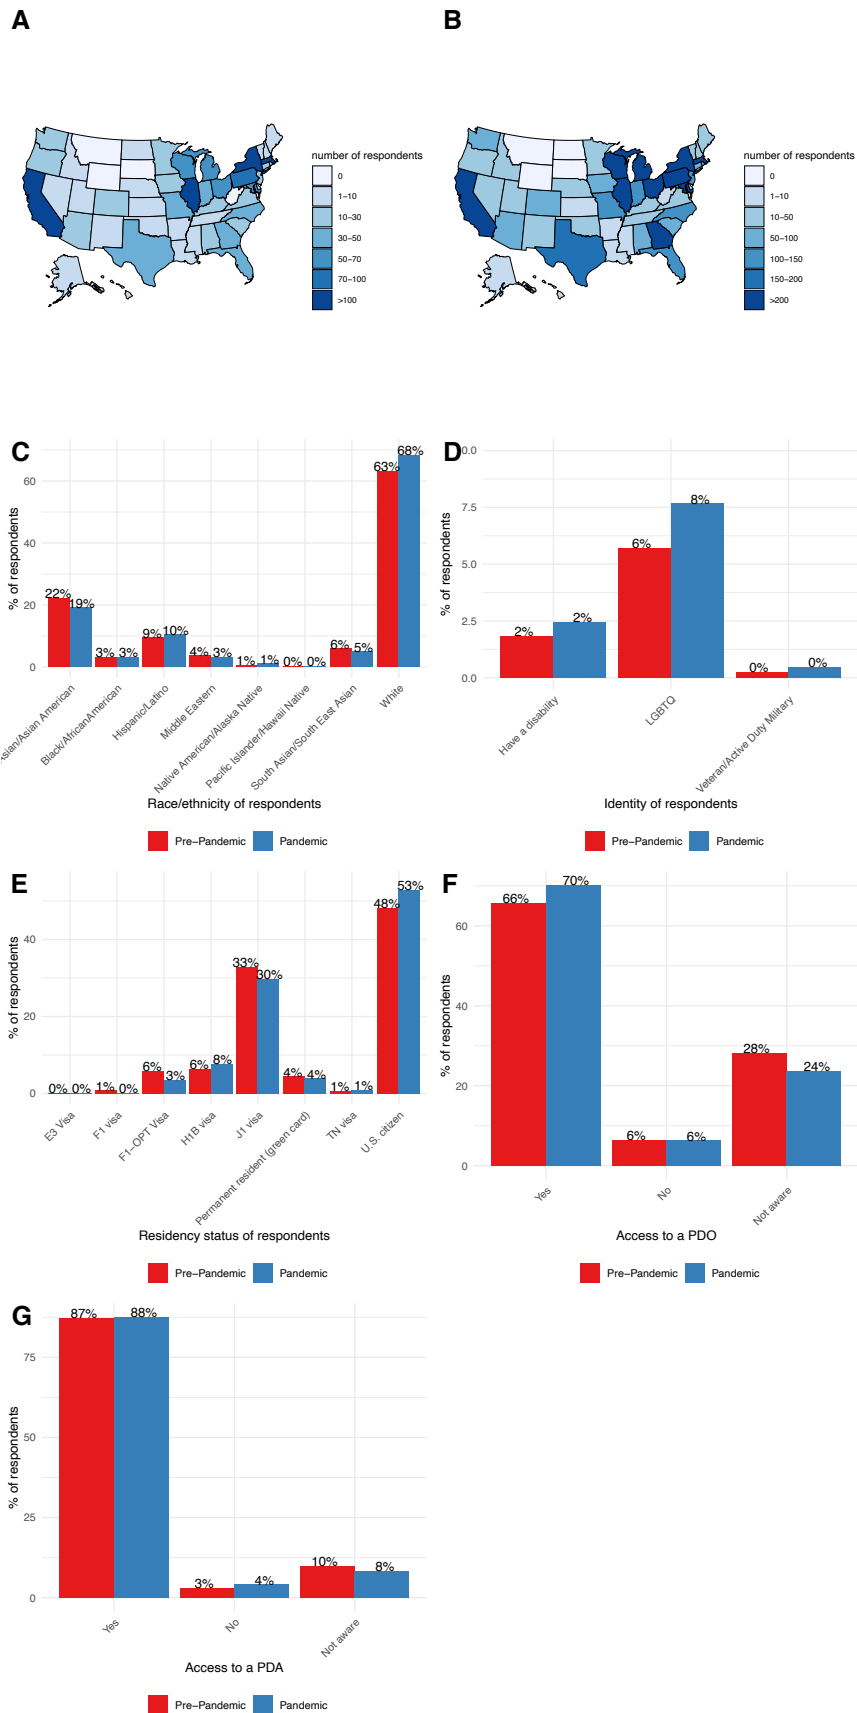

**Figure 1–figure supplement 1. Comparison of demographics between pandemic and pre-pandemic surveys.**

**(A-B)** Number of respondents in the pandemic **(A)** and pre-pandemic survey **(B)** by states. **C.** Percentage of respondents by race and ethnicity groups in the pandemic and pre-pandemic surveys. Less respondents identify as Asian and Asian American in the pandemic survey (Chi-squared test,  $\chi^2=20.11$ ,  $p=0.0053$ ). **D.** Percentage of respondents by identity. All of the identity groups were more represented in the pandemic survey compared to the pre-pandemic survey. **E.** Percentage of respondents by residency status, a larger percentage of respondents were US citizens and a smaller percentage of F1-OPT visa holders in the pandemic survey (Chi-squared test,  $\chi^2=36.94$ ,  $p = 1.18 \times 10^{-5}$ ). **F.** Increased access to a PDO was observed during the pandemic, mainly due to an increase of awareness of such institutional resource (Chi-squared test,  $\chi^2=13.87$ ,  $p = 9.73 \times 10^{-4}$ ). **G.** No differences were observed in access to a PDA before or during the pandemic.

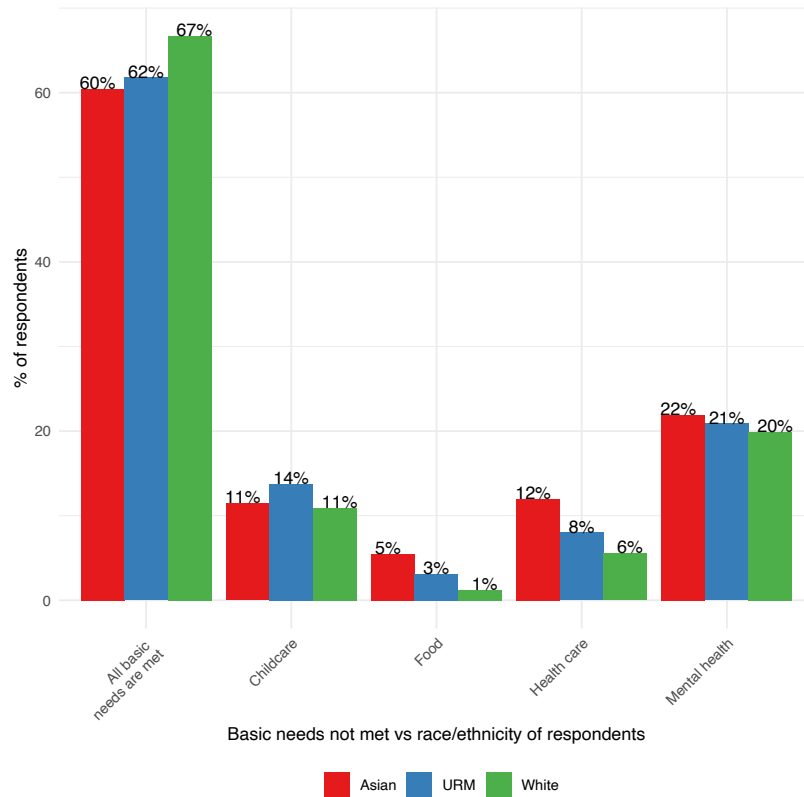

**Figure 2–figure supplement 1. Basic needs not met by race/ethnicity groups.**

**A.** Postdocs who identified as Asian did not have health care (12% vs 5%, Chi-squared test,  $\chi^2=17.3$ ,  $p=1.7 \times 10^{-4}$ ) or food (5% vs 1%, Chi-squared test,  $\chi^2=21.76$ ,  $p=1.88 \times 10^{-5}$ ) basic needs met compared to white postdocs.

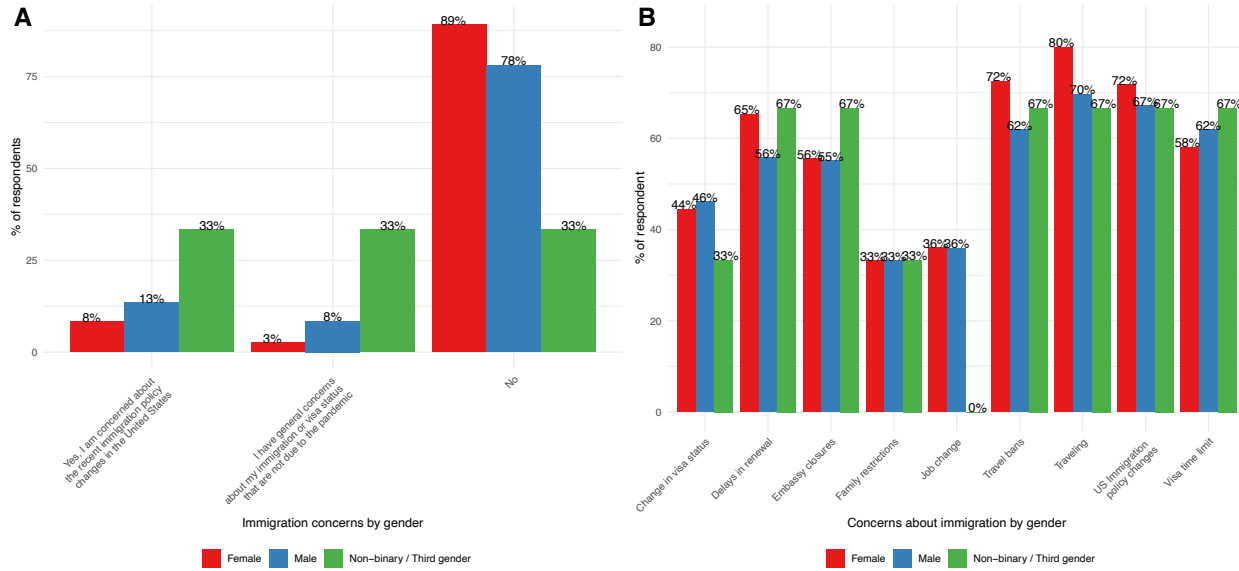

**Figure 3—figure supplement 1. Immigration concerns by gender.**

**A.** Females were more concerned than males (Chi-squared test,  $\chi^2=24.8$ ,  $p=5.6 \times 10^{-5}$ ) ( $n=718$ ) and **B.** were more concerned about traveling (Chi-squared test,  $\chi^2=10.15$ ,  $p=0.006$ ), delays in visa renewal (Chi-squared test,  $\chi^2=6.83$ ,  $p=0.032$ ) and travel bans (Chi-squared test,  $\chi^2=9.02$ ,  $p=0.011$ ) ( $n=715$ ).



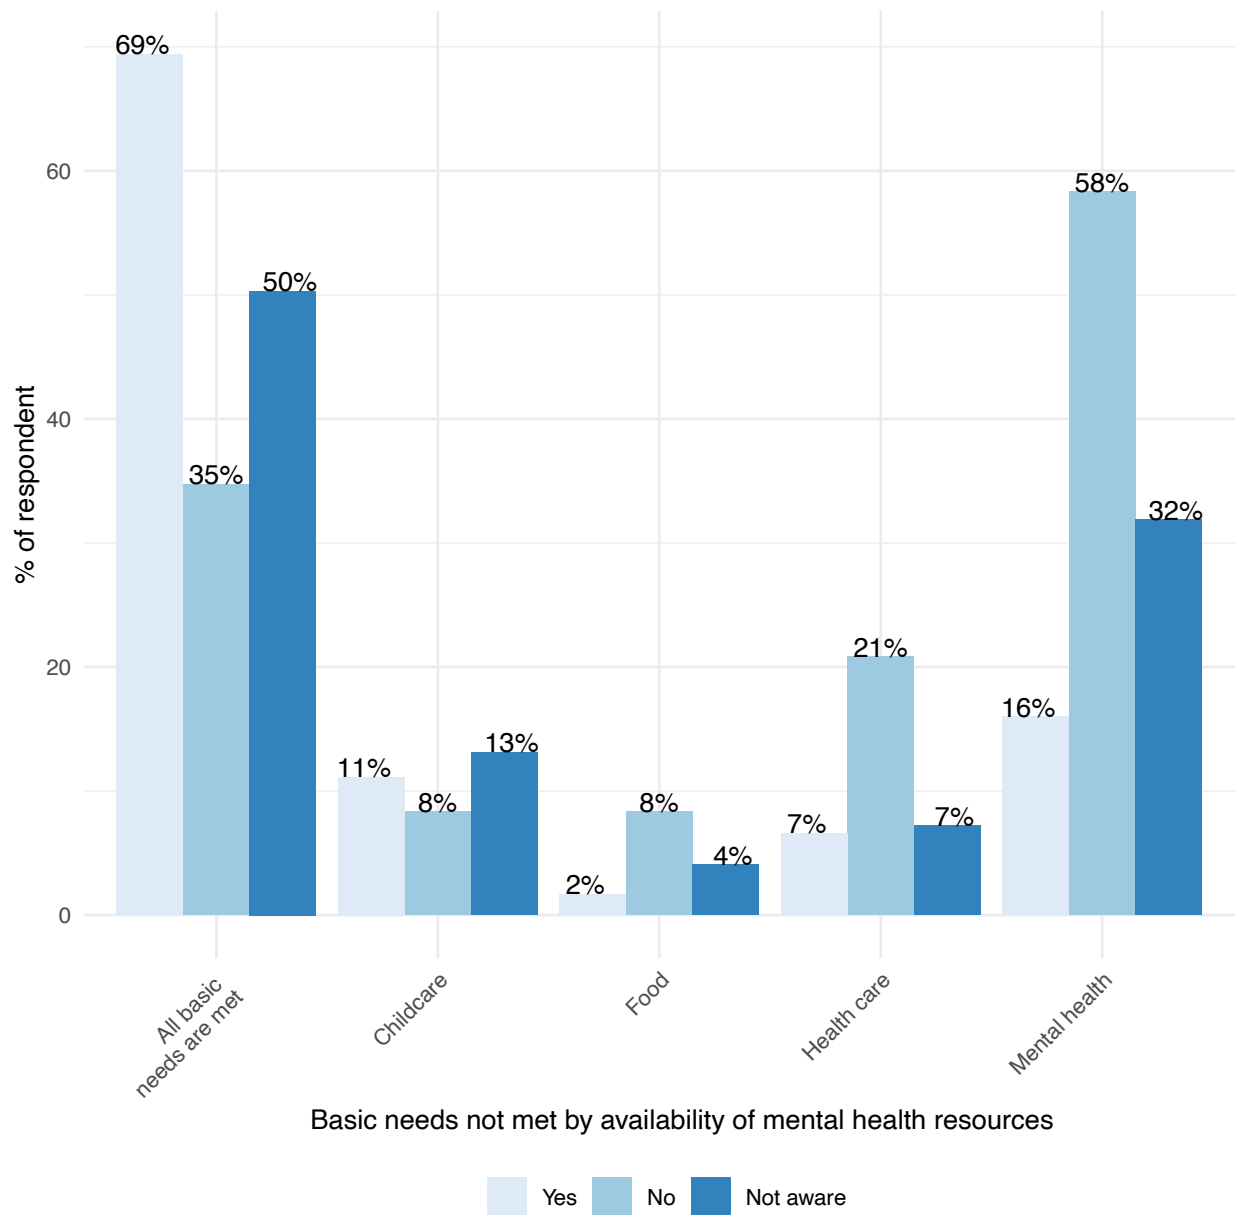

**Figure 4—figure supplement 1. Effect of institutional resources on having mental health needs met.**

**A.** Postdocs that did not have access to mental health resources through their institutions or were unaware if their institutions had mental health resources were also more likely to have other basic needs unmet such as food (Chi-squared test,  $\chi^2=20.5$ ,  $p=3.54e-5$ ) or health care (Chi-squared test,  $\chi^2=17.7$ ,  $p=1.44e-4$ ).

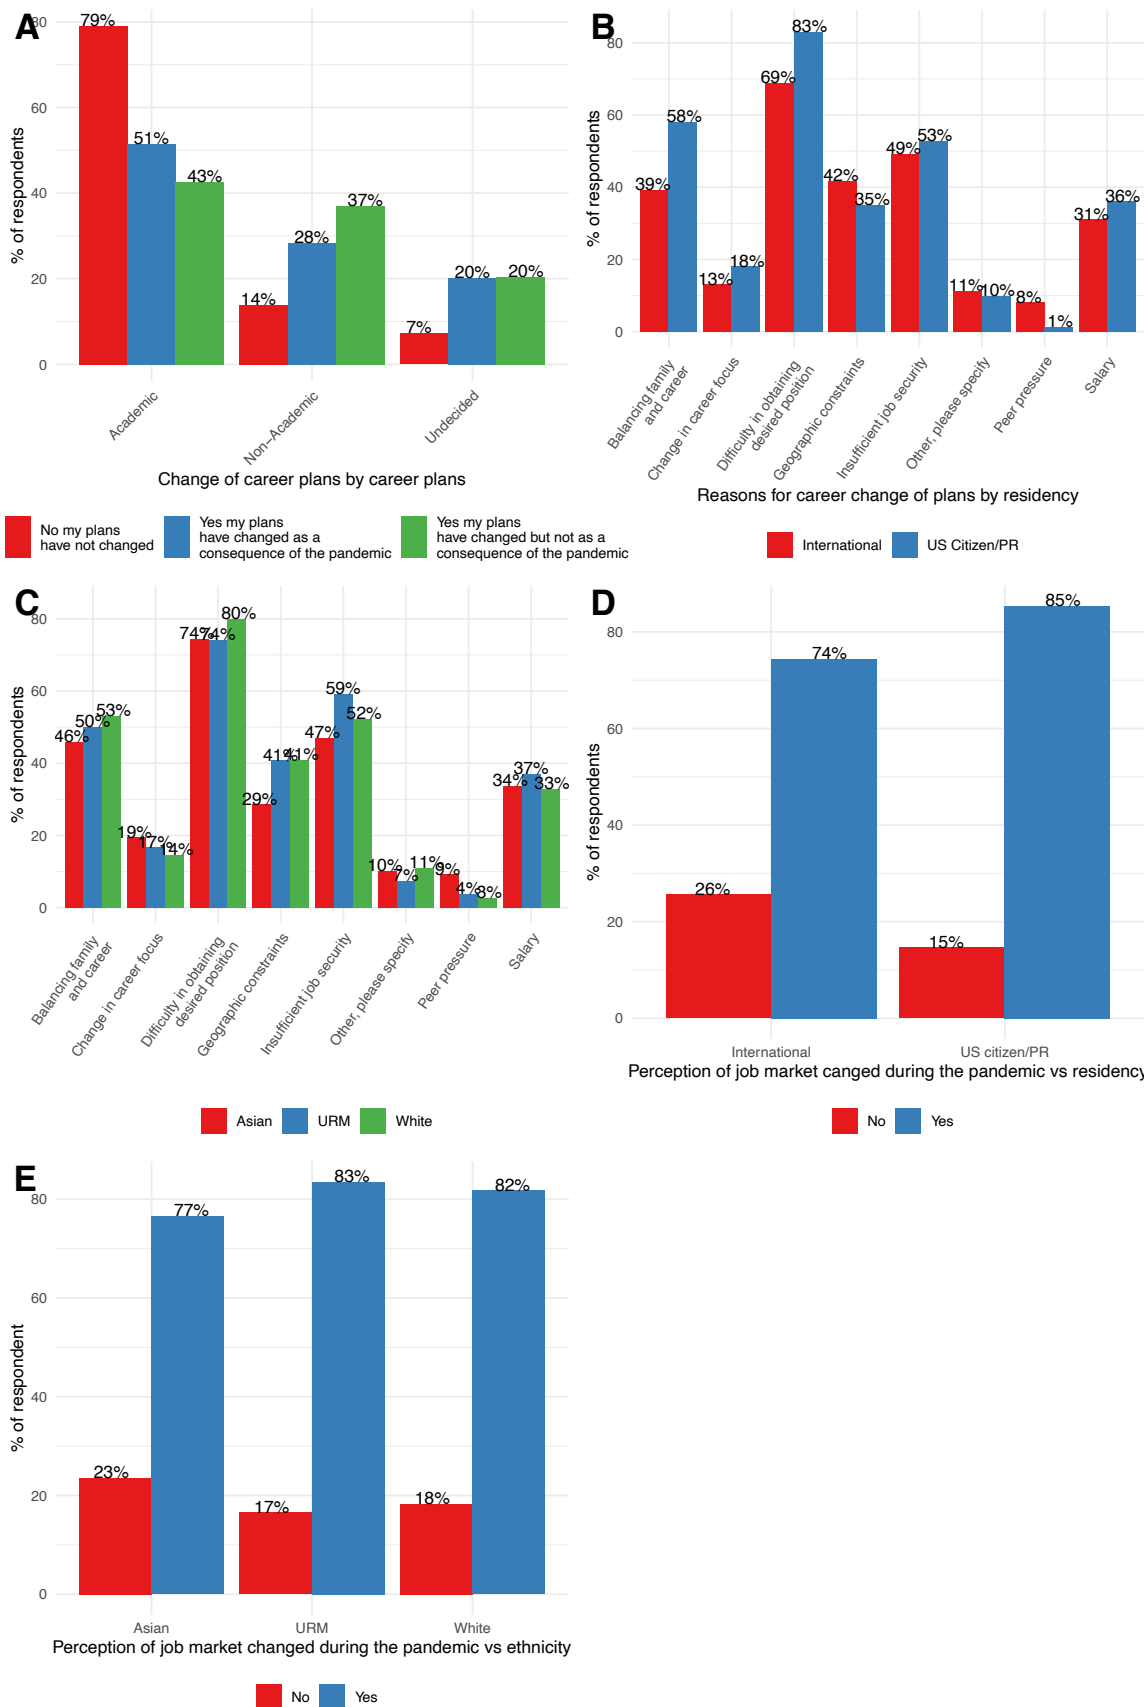

**Figure 5—figure supplement 1. Change in career plans broken down by demographics.**

**A.** Postdocs that changed their career plans due to the pandemic or not, were less likely to pursue an academic position and were more likely to be undecided (Chi-squared test,  $\chi^2=169.91$ ,  $p=1.09e-35$ ;  $n=1691$ ). **B.** Reasons for change of career plans differ by residency status (Chi-squared test,  $\chi^2=8.92$ ,  $p=0.0028$  (peer pressure),  $\chi^2=9.47$ ,  $p=0.002$  (difficulty of finding desired position),  $\chi^2=12.7$ ,  $p=0.00037$  (balancing family and career);  $n=383$ ) and **C.** race/ethnicity (Chi-squared test,  $\chi^2=6.97$ ,  $p=0.031$ , posthoc  $p=0.05$  (peer pressure);  $n=380$ ) **D.** Job market perception changed during COVID-19 by residency status, (Chi-squared test,  $\chi^2=31.32$ ,  $p=2.18e-8$ ;  $n=1,692$ ) and **E.** race/ethnicity, (Chi-squared test,  $\chi^2=6.22$ ,  $p=0.045$ ;  $n=1,665$ ).
